# Supplementary material for: Kidney disease and risk of dementia: a Danish nationwide cohort study
Source: PubMed Central journal article supplement — BMJ Open. 2021 Oct 22;11(10):e052652. doi: 10.1136/bmjopen-2021-052652 (PMC8543681; doi:10.1136/bmjopen-2021-052652), 2021-10-22
Supplement: bmjopen-2021-052652.draft_revisions.pdf [file bmjopen-2021-052652.draft_revisions.pdf]

# BMJ Open

BMJ Open is committed to open peer review. As part of this commitment we make the peer review history of every article we publish publicly available.

When an article is published we post the peer reviewers' comments and the authors' responses online. We also post the versions of the paper that were used during peer review. These are the versions that the peer review comments apply to.

The versions of the paper that follow are the versions that were submitted during the peer review process. They are not the versions of record or the final published versions. They should not be cited or distributed as the published version of this manuscript.

BMJ Open is an open access journal and the full, final, typeset and author-corrected version of record of the manuscript is available on our site with no access controls, subscription charges or pay-per-view fees (<http://bmjopen.bmj.com>).

If you have any questions on BMJ Open's open peer review process please email [info.bmjopen@bmj.com](mailto:info.bmjopen@bmj.com)

# BMJ Open

## Kidney disease and risk of dementia: a cohort study

|                               |                                                                                                                                                                                                                                                                                                                                                                                                      |
|-------------------------------|------------------------------------------------------------------------------------------------------------------------------------------------------------------------------------------------------------------------------------------------------------------------------------------------------------------------------------------------------------------------------------------------------|
| Journal:                      | <i>BMJ Open</i>                                                                                                                                                                                                                                                                                                                                                                                      |
| Manuscript ID                 | bmjopen-2021-052652                                                                                                                                                                                                                                                                                                                                                                                  |
| Article Type:                 | Original research                                                                                                                                                                                                                                                                                                                                                                                    |
| Date Submitted by the Author: | 21-Apr-2021                                                                                                                                                                                                                                                                                                                                                                                          |
| Complete List of Authors:     | Kjaergaard, Alisa; Aarhus University Hospital, Steno Diabetes Center Aarhus<br>Joahannesen, Benjamin; Aarhus University Hospital, Department of Clinical Epidemiology<br>Sørensen, Henrik T.; Aarhus University Hospital, Department of Clinical Epidemiology<br>Henderson, Victor; Stanford University,<br>Christiansen, Christian; Aarhus University Hospital, Department of Clinical Epidemiology |
| Keywords:                     | Dementia < NEUROLOGY, EPIDEMIOLOGY, Nephrology < INTERNAL MEDICINE                                                                                                                                                                                                                                                                                                                                   |
|                               |                                                                                                                                                                                                                                                                                                                                                                                                      |

SCHOLARONE™  
Manuscripts

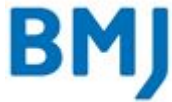

I, the Submitting Author has the right to grant and does grant on behalf of all authors of the Work (as defined in the below author licence), an exclusive licence and/or a non-exclusive licence for contributions from authors who are: i) UK Crown employees; ii) where BMJ has agreed a CC-BY licence shall apply, and/or iii) in accordance with the terms applicable for US Federal Government officers or employees acting as part of their official duties; on a worldwide, perpetual, irrevocable, royalty-free basis to BMJ Publishing Group Ltd ("BMJ") its licensees and where the relevant Journal is co-owned by BMJ to the co-owners of the Journal, to publish the Work in this journal and any other BMJ products and to exploit all rights, as set out in our [licence](#).

The Submitting Author accepts and understands that any supply made under these terms is made by BMJ to the Submitting Author unless you are acting as an employee on behalf of your employer or a postgraduate student of an affiliated institution which is paying any applicable article publishing charge ("APC") for Open Access articles. Where the Submitting Author wishes to make the Work available on an Open Access basis (and intends to pay the relevant APC), the terms of reuse of such Open Access shall be governed by a Creative Commons licence – details of these licences and which [Creative Commons](#) licence will apply to this Work are set out in our licence referred to above.

Other than as permitted in any relevant BMJ Author's Self Archiving Policies, I confirm this Work has not been accepted for publication elsewhere, is not being considered for publication elsewhere and does not duplicate material already published. I confirm all authors consent to publication of this Work and authorise the granting of this licence.

## Kidney disease and risk of dementia: a cohort study

Short title: Kidney disease and dementia

Alisa D. Kjaergaard <sup>a, b</sup>, PhD ; Benjamin R. Johannesen <sup>a</sup>, PhD; Henrik T. Sørensen <sup>a, c</sup>,  
DMSci; Victor W. Henderson <sup>a, d</sup> MD; Christian F. Christiansen <sup>a</sup>, PhD

<sup>a</sup> Department of Clinical Epidemiology, Aarhus University Hospital, DK-8200 Aarhus,  
Denmark

<sup>b</sup> Steno Diabetes Center Aarhus, Aarhus University Hospital, DK-8200 Aarhus, Denmark

<sup>c</sup> Excellence Research Center, Stanford University, Stanford, CA, USA

<sup>d</sup> Departments of Epidemiology and Population Health and of Neurology and Neurological  
Sciences, Stanford University, Stanford, CA, USA

### Corresponding author:

Alisa D. Kjaergaard MD, PhD

alisa.kjaergaard@auh.rm.dk, alisa@devedzic.dk, phone: +45 61667297

Hedeager 3, Steno Diabetes Center Aarhus, Aarhus University Hospital, Denmark

**Word count** (Introduction-Discussion): 2,917; Abstract: 251

Tables: 2; Figures: 3; Supplemental tables: 1; Supplemental figures: 1

## ABSTRACT

**Objectives:** It is unclear whether kidney disease is a risk factor for developing dementia.

We examined the impact of kidney disease on risk of future dementia.

**Design and setting:** Nationwide cohort study in Denmark from January 1<sup>st</sup> 1995 until December 31<sup>st</sup> 2016.

**Participants:** Patients diagnosed with kidney disease and matched general population cohort without kidney disease (matched 1:5 on age, sex and year of kidney disease diagnosis).

**Primary and secondary outcome measures:** All-cause dementia and its subtypes: Alzheimer's disease, vascular dementia and other specified or unspecified dementia. We computed five-year cumulative incidences (risk) and hazard ratios (HRs) for outcomes using Cox regression analyses.

**Results:** The study cohort comprised of 82,690 patients with kidney disease and 413,405 individuals from the general population. Five- and ten-year mortality rates were twice as high in patients with kidney disease compared to the general population. The five-year risk for all-cause dementia was 2.90% (95% confidence intervals: 2.78%-3.08%) in patients with kidney disease and 2.98% (2.92%-3.04%) in the general population. Compared to the general population, the adjusted HRs for all-cause dementia in patients with kidney disease were 1.06 (1.00-1.12) for the five-year follow-up and 1.08 (1.03-1.12) for the entire study period. Risk estimates for dementia subtypes differed substantially and were lower for Alzheimer's disease and higher for vascular dementia.

1  
2  
3  
4 **Conclusions:** Patients diagnosed with kidney disease have a modestly increased rate of  
5  
6 dementia, mainly driven by vascular dementia. Moreover, patients with kidney disease  
7  
8 may be underdiagnosed with dementia due to high mortality and other comorbidities of  
9  
10 higher priority.  
11  
12  
13  
14  
15  
16

## 17 **Article summary**

### 20 **Strengths and limitations of this study (5 bullet points on methods):**

- 23 • This is the first European population-based study examining the impact of hospital-  
24 diagnosed kidney disease on risk of future dementia.
- 25 • Using a large nationwide registry-based cohort study in a universal healthcare  
26 system with individual-level data on all participants and a complete follow-up largely  
27 eliminated selection bias.
- 28 • We did not have data on albuminuria or estimated glomerular filtration rate (eGFR).
- 29 • Not all individuals with kidney disease or dementia are hospital-diagnosed and  
30 captured in the Danish registries.
- 31 • Results pertaining to dementia subtypes should be interpreted cautiously due to  
32 potential differential misclassification of dementia subtypes, particularly among  
33 patients with kidney disease  
34  
35  
36  
37  
38  
39  
40  
41  
42  
43  
44  
45  
46  
47  
48  
49  
50  
51

## 52 **Contributors**

53  
54  
55  
56  
57  
58  
59  
60

1  
2  
3  
4 BRK and CFC had full access to all of the data in the study and take responsibility for the  
5  
6 integrity of the data and accuracy of the data analysis. ADK and CFC are guarantors of the  
7  
8 study.  
9

10  
11  
12 Concept and design: ADK, BRJ, HTS, VWF and CFC. Statistical analysis: BRJ. Drafting of  
13  
14 the manuscript: ADK. Supervision: CFC. Interpretation and critical revision of the  
15  
16 manuscript for important intellectual content: ADK, BRJ, HTS, VWF and CFC.  
17

18  
19  
20 We thank Thomas Bøjer Rasmussen for valuable contributions to the discussion on study  
21  
22 design and statistical analyses.  
23

## 24 25 **Funding**

26  
27  
28 This work was supported by a grant from Lundbeckfonden (grant no. R248-2017-521) and  
29  
30 from the Independent Research Fund Denmark (grant no. 0134-00407B). ADK is funded  
31  
32 by an unrestricted grant from Novo Nordisk (grant no. N/A). VWH is funded by a National  
33  
34 Institute of Health (grant no. P30AG066615).  
35

36  
37  
38 The funding sources had no role in the design, conduct, analysis or reporting of this study.  
39

## 40 41 **Competing interests**

42  
43  
44 The authors have no conflicts. The Department of Clinical Epidemiology, Aarhus University  
45  
46 Hospital, receives funding for other studies from companies in the form of research grants  
47  
48 to (and administered by) Aarhus University.  
49

## 50 51 **Patient consent for publication / Ethics approval**

52  
53  
54 The study was registered at Aarhus University (record number 2016-051-000001/603) as  
55  
56 mandated by the Danish Data Protection Agency. According to Danish legislation, registry-  
57  
58  
59  
60

1  
2  
3  
4 based studies do not require ethical review board approval or informed consent from the  
5  
6 participants  
7  
8

9  
10 **Data availability statement**  
11

12  
13 Data was accessed at secure servers, and cannot be shared due to Danish legislation.  
14  
15  
16  
17  
18  
19  
20  
21  
22  
23  
24  
25  
26  
27  
28  
29  
30  
31  
32  
33  
34  
35  
36  
37  
38  
39  
40  
41  
42  
43  
44  
45  
46  
47  
48  
49  
50  
51  
52  
53  
54  
55  
56  
57  
58  
59  
60

For peer review only



## INTRODUCTION

Dementia is a common, progressive age-related neurological disorder diagnosed when acquired cognitive impairment has become severe enough to compromise social and/or occupational functioning.<sup>1</sup> Although the incidence rates of dementia have decreased modestly over the last 30 years, the prevalence of dementia is increasing worldwide, likely due to increased life expectancy.<sup>2</sup> This has enormous costs for the individuals and families affected, as well as the health care and society.<sup>3</sup>

Kidney disease is another disorder with a high (close to 10%) and increasing prevalence, partly due to ageing population, and increased incidence rates of hypertension and diabetes mellitus.<sup>4</sup>

Kidney disease and dementia share risk factors such as increasing age, hypertension, diabetes mellitus and hyperlipidemia, and the pathophysiology of small vessel disease.<sup>5, 6</sup>

One potential link between kidney disease and dementia could be common susceptibility of kidney and brain tissue to vascular injury.<sup>7</sup> Kidney disease is associated with oxidative stress, chronic inflammation and changes in coagulation, and it might also affect the brain or cerebral vasculature indirectly or directly through metabolic derangements and uremic toxins.<sup>7</sup>

A previous population-based study in Taiwan found a hazard ratio (HR) of 1.41 for all-cause dementia in patients with a diagnosis of kidney disease (N=37,049) compared to the general population (N=74,098).<sup>8</sup> However, these findings may not be applicable to European populations, and this study did not examine potential differences across dementia subtypes. Furthermore, previous studies, where kidney disease was defined as persistent albuminuria or estimated glomerular filtration rate (eGFR) below 60 ml/min/1.73 m<sup>2</sup>, provided mixed results.<sup>9-12</sup> Thus, whether kidney disease has an impact on risk of

1  
2  
3  
4 dementia is presently uncertain. We investigated this for all-cause dementia and dementia  
5  
6 subtypes (Alzheimer's disease, vascular and other dementia) in a nationwide cohort study.  
7  
8  
9

## 10 11 **METHODS**

12  
13 We followed the STROBE guidelines for reporting of cohort studies in epidemiology.  
14

### 15 16 *Study cohort*

17  
18 We conducted a nationwide cohort study of all Danish patients with hospital-diagnosed  
19  
20 kidney disease and a matched general population comparison cohort without kidney  
21  
22 disease during a study period from January 1<sup>st</sup> 1995 until December 31<sup>st</sup> 2016.  
23

24  
25 A flow chart of the study cohort is shown in Figure 1. We identified 122,670 patients with a  
26  
27 first-time kidney disease diagnosis recorded during the study period. Next, we excluded  
28  
29 patients who died (N=32,196) or did not reside in Denmark (N=465) during the first year  
30  
31 after kidney disease diagnosis. Further exclusion criteria were diagnosis of dementia  
32  
33 (N=1,909) and prodromal signs of dementia, i.e., mild cognitive impairment and amnesic  
34  
35 syndrome (N=303) before kidney disease diagnosis. Additionally, we excluded patients  
36  
37 diagnosed with dementia (N=1,300) and prodromal signs of dementia (N=156) during first  
38  
39 year after a kidney disease diagnosis, because dementia diagnosed in this period is  
40  
41 unlikely to be a consequence of kidney disease. Finally, we limited the cohort to adult  
42  
43 patients aged 18 and above. The remaining 82,690 patients comprised our kidney disease  
44  
45 cohort. For each patient in the kidney disease cohort, up to five individuals from the  
46  
47 general population without a kidney disease diagnosis prior to index date were randomly  
48  
49 selected and matched on age (birth year), sex and calendar year of index date, i.e., date of  
50  
51 kidney disease diagnosis. Matching was performed as individual matching with  
52  
53 replacement. The general population comparison cohort comprised of 413,405 individuals,  
54  
55  
56  
57  
58  
59  
60

1  
2  
3  
4 who were alive and had no dementia, mild cognitive impairment, amnestic syndrome or  
5  
6 kidney disease prior to study entry.  
7

### 8 9 *Diagnoses*

10  
11 Diagnoses of kidney disease (exposure), dementia (outcome), mild cognitive impairment,  
12  
13 amnestic syndrome and potential confounders were based on diagnoses obtained from  
14  
15 the Danish National Patient Registry and/or the Danish Psychiatric Central Research  
16  
17 Registry. These registries, covering all Danish hospitals, have recorded hospital  
18  
19 admissions since 1977 and 1969 respectively, as well as outpatient specialist clinic visits  
20  
21 since 1995.<sup>13-15</sup> We used all primary and secondary discharge diagnoses for all  
22  
23 hospitalizations and outpatient clinic visits, but not emergency room visits (as diagnoses in  
24  
25 this setting may be tentative and thus less valid). Diagnoses were identified according to  
26  
27 the World Health Organization (WHO) International Classification of Diseases 8<sup>th</sup> edition  
28  
29 (ICD-8) until the end of 1993 and 10<sup>th</sup> edition (ICD-10) thereafter (Supp. Table 1). We used  
30  
31 the date of hospital admission or start of outpatient clinic follow-up as the date for all  
32  
33 diagnoses.  
34  
35  
36  
37

### 38 39 *Kidney disease*

40  
41 In the main analysis, we used an extended definition of kidney disease including chronic  
42  
43 kidney disease as well as several other persistent kidney diseases, dialysis treatment and  
44  
45 kidney transplant (for ICD codes, see Supplemental Table 1). In a sensitivity analysis, we  
46  
47 used chronic kidney disease (restricted to ICD-8 792 and ICD-10 N18) as the exposure for  
48  
49 all-cause dementia only.  
50

### 51 52 *Dementia*

53  
54 The validity of all-cause dementia is high with a positive predictive value of 86% in the  
55  
56 Danish registries.<sup>16</sup> Dementia subtypes were mutually exclusive, and we only used the first  
57  
58  
59  
60

1  
2  
3  
4 ever coded dementia subtype: Alzheimer's disease, vascular dementia and other  
5  
6 (specified or unspecified) dementia, the latter comprising the majority of dementia  
7  
8 diagnoses (for ICD codes, see Supp. Table 1). Because about one third of cases with  
9  
10 other dementia without specification may be attributable to Alzheimer's disease,<sup>16</sup> we also  
11  
12 included a combined outcome of Alzheimer's disease and other dementia.  
13  
14

### 15 *Covariates*

16  
17 We identified cardiovascular disease (CVD), CVD risk factors, (any) cancer and  
18  
19 socioeconomic status as potential confounders due to their association with kidney  
20  
21 disease and dementia.<sup>5, 6, 17</sup> All covariates were assessed prior to study entry. CVD  
22  
23 covariates were angina pectoris, myocardial infarction, stroke, peripheral arterial disease,  
24  
25 venous thromboembolism, heart failure, heart valve disease and atrial fibrillation.  
26  
27 Covariates related to CVD risk factors were hypercholesterolemia, hypertension, obesity,  
28  
29 diabetes mellitus, and chronic obstructive pulmonary disease as a proxy for smoking. CVD  
30  
31 risk factors were based on diagnoses from the Danish National Patient Registry and  
32  
33 additionally on prescriptions of lipid lowering and antihypertensive drugs (see Anatomical  
34  
35 Therapeutic Chemical [ATC] codes in Supp. Table 1) from the Danish National  
36  
37 Prescription Registry, containing detailed individual-level data on prescriber, patient, and  
38  
39 products for all outpatient prescriptions dispensed since 1995.<sup>18</sup>  
40  
41 Covariates related to socioeconomic status were highest education achieved, personal  
42  
43 gross income and employment status obtained from the Integrated Database for Labor  
44  
45 Market Research, established in 1981.<sup>19</sup> Education was categorized as: low (elementary  
46  
47 school only), medium (high school and/or academy profession degree) and high  
48  
49 (bachelor's, master's or higher degree). Personal gross income was categorized in  
50  
51 quartiles. Employment status was categorized as: employed, retired and unemployed. We  
52  
53  
54  
55  
56  
57  
58  
59  
60

1  
2  
3  
4 used employment status during the 12-24 months preceding the study entry, since  
5  
6 employment status during the year prior to kidney disease diagnosis is likely to  
7  
8 underestimate the peak employment status.  
9

### 10 *Patient and public involvement*

11  
12  
13  
14 No patient involved.  
15

### 16 *Statistical analysis*

17  
18 We compared cumulative incidence (risk) of death as well as all-cause dementia (taking  
19  
20 the competing risk of death into account) for the kidney disease and comparison cohorts.  
21  
22 Hazard ratios for all-cause dementia and dementia subtypes and their corresponding 95%  
23  
24 confidence intervals (CIs) were calculated using Cox regression analyses with time-on-  
25  
26 study as the time scale. Proportional hazards assumption was tested graphically by log-log  
27  
28 plots, and no violations were detected. Age, sex and calendar year of index date were  
29  
30 already controlled for in the unadjusted Cox model, as these were the matching criteria.  
31  
32 However, due to the built-in selection bias (see Discussion), the matching could not be  
33  
34 completely retained, and the adjusted Cox model therefore included adjustments for age  
35  
36 (age groups listed in Table 1), sex and calendar year of index date, as well as other  
37  
38 potential confounders. Participants with missing values (<1% of personal gross income  
39  
40 and <11% of employment status and education level each) were excluded from the  
41  
42 adjusted analyses. Participants were followed from one year after index date until  
43  
44 December 31<sup>st</sup> 2016, diagnosis of dementia, emigration or death, whichever came first.  
45  
46 Thus, the minimum follow-up time was one year and maximum 22 years. Because all  
47  
48 diagnoses and vital and emigration status are registered in national registries, we had no  
49  
50 losses to follow-up.  
51  
52  
53  
54  
55  
56  
57  
58  
59  
60

1  
2  
3  
4 We performed predefined stratification analyses for age (18-49, 50-59, 60-74, 75-84 and  
5  
6 >85 years), sex, calendar year of index date (1995-2003 or 2004-2016), CVD, CVD risk  
7  
8 factors, socioeconomic factors and follow-up time (1-5 years, 1-10 years and 1-22 years).  
9  
10  
11 Finally, in order to assess whether the risk of all-cause dementia was linked to kidney  
12  
13 disease severity, we stratified the kidney disease cohort by presence or absence of kidney  
14  
15 failure (defined as receiving dialysis treatment and/or kidney transplant, for codes see  
16  
17 Supp. Table 1).

18  
19  
20 All analyses were performed using SAS version 9.4 (SAS Institute Inc., Cary, NC, USA).

### 21 22 23 *Ethics*

24  
25  
26 The study was registered at Aarhus University (record number 2016-051-000001/603) as  
27  
28 mandated by the Danish Data Protection Agency. According to Danish legislation, registry-  
29  
30 based studies do not require ethical review board approval or informed consent from the  
31  
32 participants.  
33  
34  
35  
36  
37  
38

## 39 40 41 **RESULTS**

42  
43 The study cohort consisted of a kidney disease cohort of 82,690 patients with kidney  
44  
45 disease and a comparison cohort of 413,405 matched individuals from the general  
46  
47 population without kidney disease. The median age was 69 years (interquartile range: 56-  
48  
49 78 years). Women comprised 41% of all participants, and 71% were enrolled during 2004-  
50  
51 2016 and 29% during 1995-2003 (Table 1). Diagnoses of CVD and CVD risk factors were  
52  
53 much more frequent in the kidney disease than in the comparison cohort (Table 1).  
54  
55 Furthermore, the kidney disease cohort had lower income, more unemployment and lower  
56  
57 education than the comparison cohort (Table 1). Finally, the follow-up time was shorter for  
58  
59  
60

1  
2  
3  
4 the kidney disease than for the comparison cohort, with a median of 3.68 and 5.24 years,  
5  
6 respectively (Table 1). This difference reflects a higher mortality rate in the kidney disease  
7  
8 than the comparison cohort: 5- and 10-year mortality was twice as high in patients with  
9  
10 kidney disease compared to the general population (Figure 2). During the study period,  
11  
12 466,071 (94%) participants died, 78,555 (95%) from the kidney disease cohort and  
13  
14 387,516 (94%) from the comparison cohort.  
15  
16

### 17 18 19 *Kidney disease and risk of developing dementia*

20  
21  
22 During follow-up, 3,462 (4.19% of 82,690) patients with kidney disease and 21,879 (5.29%  
23  
24 of 413,405) individuals from the comparison cohort developed dementia, the majority  
25  
26 classified as other dementia (Table 2). Alzheimer's disease was more frequent in the  
27  
28 comparison cohort, and vascular dementia in the kidney disease cohort (Table 2).  
29  
30

31  
32 The 5-, 10-, and 22-year risks of all-cause dementia were lower in patients with kidney  
33  
34 disease than in the general population: 2.90% (95% CIs: 2.78%-3.08%), 4.96% (4.79%-  
35  
36 5.14%) and 7.05% (6.70%-7.41%) for the kidney disease cohort and 2.98% (2.92%-  
37  
38 3.04%), 6.03% (5.94%-6.12%) and 10.39% (10.17%-10.60%) for the comparison cohort  
39  
40 (Figure 2).  
41  
42

43  
44 The estimates for dementia subtypes were lowest for Alzheimer's disease and highest for  
45  
46 vascular dementia (Table 2).  
47  
48

49  
50 The adjusted HR (aHR) for all-cause dementia was stable over time, 1.06 (1.00-1.12) for  
51  
52 up to 5 years of follow-up, 1.08 (1.03-1.13) for up to 10 years of follow-up and 1.08 (1.03-  
53  
54 1.12) for up to 22 years of follow-up (Table 2). When we restricted the kidney disease  
55  
56  
57  
58  
59  
60

1  
2  
3  
4 exposure to chronic kidney disease only, the aHR for all-cause dementia was 1.04 (0.98-  
5 1.10) for up to 22 years of follow-up, and very similar for shorter follow-up (Table 2).  
6  
7

8  
9  
10 In analyses stratified by age, there was a stepwise decrease in HRs of all-cause dementia  
11 with increasing age: the aHRs for 18-49, 50-59, 60-74, 75-84 and  $\geq 85$  years age groups  
12 were 1.14 (0.78-1.67), 1.32 (1.09-1.61), 1.16 (1.08-1.24), 1.01 (0.95-1.08) and 0.90 (0.77-  
13 1.04), respectively. The rate of all-cause dementia did not differ by sex, calendar year of  
14 index date, or socioeconomic factors. Kidney disease was also associated with increased  
15 HR for dementia in most CVD subgroups (myocardial infarction, stroke, peripheral arterial  
16 disease, venous thromboembolism, heart failure and heart valve disease) and CVD risk  
17 factors (atrial fibrillation, hypertension, obesity and diabetes mellitus), but estimates were  
18 imprecise (Figure 3). Results for dementia subtypes showed consistent results (Supp.  
19 Figure 1).  
20  
21  
22  
23  
24  
25  
26  
27  
28  
29  
30  
31  
32  
33  
34  
35  
36  
37  
38  
39

## DISCUSSION

40 In this nationwide study of nearly 500,000 participants, we found that being diagnosed with  
41 kidney disease is associated with a modestly increased risk of future dementia. When we  
42 restricted the exposure to chronic kidney disease only, the association was similar.  
43  
44  
45  
46  
47

48 We found substantially smaller estimates than the only previous population-based study,  
49 where investigators in Taiwan found an HR of 1.41 (1.32-1.50) for all-cause dementia in  
50 patients with kidney disease compared to the general population.<sup>8</sup> This may partly be  
51 explained by differences between these Asian and European populations, study design  
52 differences or both. Our study included more recent data, five times as many participants,  
53  
54  
55  
56  
57  
58  
59  
60



1  
2  
3  
4 finer age matching and longer follow-up period. Furthermore, we included dialysis  
5  
6 treatment, kidney transplantation and hypertensive nephropathy in our kidney disease  
7  
8 definition, and we did not exclude participants based on other kidney-related diagnoses. In  
9  
10 contrast, the Taiwanese study excluded patients with these and several other kidney-  
11  
12 related diagnoses. Thus, our study likely included relatively more patients with severe  
13  
14 kidney disease in the kidney disease cohort and mild kidney disease in the comparison  
15  
16 cohort. Finally, while we excluded patients who were diagnosed with dementia within one  
17  
18 year after kidney disease diagnosis, the Taiwanese study did not do this, and in this  
19  
20 population the incidence rate ratio for less than two years of follow-up was substantially  
21  
22 higher than the incidence rate ratio for two or more years of follow-up.<sup>8</sup> Previous studies  
23  
24 have reported an association between severe kidney disease (eGFR<30 ml/min/1.73 m<sup>2</sup>)  
25  
26 and increased risk of cognitive impairment at baseline and cognitive decline over time.<sup>20, 21</sup>  
27  
28 However, studies that mainly included eGFR measurements within the normal range  
29  
30 showed a stronger association between albuminuria and dementia than between eGFR  
31  
32 and dementia.<sup>9-12, 22</sup> This finding is compatible with the notion that albuminuria has a better  
33  
34 sensitivity than eGFR to detect more advanced kidney disease. Unfortunately, we did not  
35  
36 have data on albuminuria or eGFR.  
37  
38  
39  
40  
41  
42  
43

44 The lack of a strong association between kidney disease and dementia may possibly be  
45  
46 explained in part by survivor bias due to very high mortality among patients with kidney  
47  
48 disease.<sup>23</sup> Because dementia increases with age, patients with kidney disease may not  
49  
50 survive long enough to develop dementia. Indeed, the fraction of participants diagnosed  
51  
52 with dementia was lower in patients with severe than mild kidney disease (3.3% of patients  
53  
54 with dialysis treatment or kidney transplant versus 4.2% of patients without these  
55  
56 interventions, data not shown). This finding may reflect survivor bias or might suggest that  
57  
58  
59  
60

1  
2  
3  
4 clinicians are more likely to underdiagnose dementia in the presence of life-threatening  
5 illness and reduced life expectancy (detection bias). This inference is further supported by  
6 our stratification analyses, showing lower risk estimates in the presence of CVD, e.g.,  
7 myocardial infarction, and CVD risk factors known to be associated with increased  
8 mortality.<sup>24</sup> In contrast, a previous Danish study of 314,911 patients with myocardial  
9 infarction matched with 1,573,193 individuals from the general population, reported that  
10 myocardial infarction was associated with higher risk of vascular dementia, but not with  
11 risk of all-cause dementia or other subtypes.<sup>25</sup> Taken together, these findings suggest a  
12 possible misclassification bias for dementia subtypes, as clinicians may be more likely to  
13 diagnose vascular dementia, and less likely Alzheimer's disease, in patients with dementia  
14 and kidney disease or myocardial infarction than in individuals without these diseases.  
15  
16  
17  
18  
19  
20  
21  
22  
23  
24  
25  
26  
27  
28  
29

30 Since HRs may change over time, the observed modest association between kidney  
31 disease and dementia may be limited to the first few years after a kidney disease  
32 diagnosis. On the other hand, the period-specific HRs are prone to a built-in selection  
33 bias.<sup>23</sup> In our study, this translates to preferential censoring of patients, due to death, from  
34 the kidney disease cohort in the beginning of follow-up. With increasing follow-up time, this  
35 can lead to a relative increase in the proportion of individuals susceptible to dementia in  
36 the comparison cohort and thereby explain why the unadjusted HRs attenuated with  
37 increasing follow-up time. Due to the built-in selection bias, the matching could not be  
38 retained, and for this reason we included matching covariates in our adjusted analysis.  
39  
40  
41  
42  
43  
44  
45  
46  
47  
48  
49  
50  
51  
52  
53  
54  
55  
56  
57  
58  
59  
60

This can possibly explain why the unadjusted HRs attenuated, while the aHRs did not  
attenuate with increasing follow-up time.

1  
2  
3  
4 The major strength of our study is its design: large nationwide registry-based cohort study  
5  
6 in a universal healthcare system with individual-level data on all participants and a  
7  
8 complete follow-up thus largely eliminating selection bias.  
9

10  
11  
12 Limitations of our study include survival and surveillance bias. Further limitations are  
13  
14 misclassification bias, unmeasured or residual confounding, quality of coding and validity  
15  
16 of diagnoses. Positive predictive value of kidney disease coded in Danish registries is  
17  
18 high, but incomplete, i.e., not all individuals with kidney disease are captured.<sup>26, 27</sup> While  
19  
20 validity of all-cause dementia and Alzheimer's disease in Danish registries is high, it is  
21  
22 lower for other dementia subtypes.<sup>16</sup> Thus, the results pertaining to dementia subtypes  
23  
24 should be interpreted cautiously. This caveat is particularly important since our results are  
25  
26 compatible with differential misclassification of dementia subtypes among patients with  
27  
28 kidney disease, where vascular risk factors are especially common, and the general  
29  
30 population, where vascular risk is lower. Furthermore, we used the date of hospital  
31  
32 admission or start of outpatient clinic follow-up as the date for all diagnoses, since the  
33  
34 exact day is not available. This may have introduced a bias, particularly in the beginning of  
35  
36 the follow-up. Finally, since all diagnoses are recorded by hospital physicians, mild kidney  
37  
38 disease and mild dementia treated only by a general practitioner would not be recorded  
39  
40 unless they were also assessed in the hospital or an outpatient clinic setting.  
41  
42  
43  
44  
45  
46

47  
48 In conclusion, patients diagnosed with kidney disease have a modestly increased risk of  
49  
50 being diagnosed with future dementia. This association is mainly driven by diagnoses of  
51  
52 vascular dementia, and it may be limited to the first few years after the kidney disease  
53  
54 diagnosis. On the other hand, patients with kidney disease may be underdiagnosed with  
55  
56 dementia due to high mortality and other comorbidities of higher priority, and the true risk  
57  
58 of future dementia may be somewhat higher than our study suggests.  
59  
60

## REFERENCES

1. Arvanitakis Z, Shah RC, Bennett DA. Diagnosis and Management of Dementia: Review. *JAMA* 2019;322:1589-1599.
2. Knopman DS. The Enigma of Decreasing Dementia Incidence. *JAMA Network Open* 2020;3:e2011199-e2011199.
3. World Alzheimer Report 2015: the Global Impact of Dementia: An Analysis of Prevalence, Incidence, Cost and Trends. Volume 2020. <https://www.alz.co.uk/research/WorldAlzheimerReport2015.pdf>, 2015.
4. Global, regional, and national burden of chronic kidney disease, 1990-2017: a systematic analysis for the Global Burden of Disease Study 2017. *Lancet* 2020;395:709-733.
5. Barnes DE, Yaffe K. The projected effect of risk factor reduction on Alzheimer's disease prevalence. *Lancet Neurol* 2011;10:819-28.
6. Ikram MA, Vernooij MW, Hofman A, et al. Kidney function is related to cerebral small vessel disease. *Stroke* 2008;39:55-61.
7. Bugnicourt JM, Godefroy O, Chillon JM, et al. Cognitive disorders and dementia in CKD: the neglected kidney-brain axis. *J Am Soc Nephrol* 2013;24:353-63.
8. Cheng KC, Chen YL, Lai SW, et al. Patients with chronic kidney disease are at an elevated risk of dementia: a population-based cohort study in Taiwan. *BMC Nephrol* 2012;13:129.
9. Deckers K, Camerino I, van Boxtel MP, et al. Dementia risk in renal dysfunction: A systematic review and meta-analysis of prospective studies. *Neurology* 2017;88:198-208.

- 1  
2  
3  
4 10. Gabin JM, Romundstad S, Saltvedt I, et al. Moderately increased albuminuria,  
5 chronic kidney disease and incident dementia: the HUNT study. *BMC Nephrol*  
6 2019;20:261.  
7  
8
- 9  
10  
11 11. Takae K, Hata J, Ohara T, et al. Albuminuria Increases the Risks for Both  
12 Alzheimer Disease and Vascular Dementia in Community-Dwelling Japanese  
13 Elderly: The Hisayama Study. *J Am Heart Assoc* 2018;7.  
14  
15
- 16  
17 12. Paterson EN, Williams MA, Passmore P, et al. Estimated Glomerular Filtration Rate  
18 is not Associated with Alzheimer's Disease in a Northern Ireland Cohort. *J*  
19 *Alzheimers Dis* 2017;60:1379-1385.  
20  
21
- 22  
23 13. Mors O, Perto GP, Mortensen PB. The Danish Psychiatric Central Research  
24 Register. *Scand J Public Health* 2011;39:54-7.  
25  
26
- 27  
28 14. Schmidt M, Schmidt SA, Sandegaard JL, et al. The Danish National Patient  
29 Registry: a review of content, data quality, and research potential. *Clin Epidemiol*  
30 2015;7:449-90.  
31  
32
- 33  
34 15. Schmidt M, Schmidt SAJ, Adelborg K, et al. The Danish health care system and  
35 epidemiological research: from health care contacts to database records. *Clin*  
36 *Epidemiol* 2019;11:563-591.  
37  
38
- 39  
40 16. Phung TK, Andersen BB, Hogh P, et al. Validity of dementia diagnoses in the  
41 Danish hospital registers. *Dement Geriatr Cogn Disord* 2007;24:220-8.  
42  
43
- 44  
45 17. Webster AC, Nagler EV, Morton RL, et al. Chronic Kidney Disease. *Lancet*  
46 2017;389:1238-1252.  
47  
48
- 49  
50 18. Pottegård A, Schmidt SAJ, Wallach-Kildemoes H, et al. Data Resource Profile: The  
51 Danish National Prescription Registry. *Int J Epidemiol* 2017;46:798-798f.  
52  
53  
54  
55  
56  
57  
58  
59  
60

- 1  
2  
3  
4 19. Petersson F, Baadsgaard M, Thygesen LC. Danish registers on personal labour  
5 market affiliation. *Scand J Public Health* 2011;39:95-8.  
6  
7
- 8  
9 20. Burns CM, Knopman DS, Tupper DE, et al. Prevalence and Risk of Severe  
10 Cognitive Impairment in Advanced Chronic Kidney Disease. *J Gerontol A Biol Sci*  
11 *Med Sci* 2018;73:393-399.  
12  
13
- 14  
15 21. Zijlstra LE, Trompet S, Mooijaart SP, et al. The association of kidney function and  
16 cognitive decline in older patients at risk of cardiovascular disease: a longitudinal  
17 data analysis. *BMC Nephrol* 2020;21:81.  
18  
19
- 20  
21 22. Guerville F, De Souto Barreto P, Coley N, et al. Kidney Function and Cognitive  
22 Decline in Older Adults: Examining the Role of Neurodegeneration. *J Am Geriatr*  
23 *Soc* 2020.  
24  
25
- 26  
27 23. Hernán MA. The hazards of hazard ratios. *Epidemiology (Cambridge, Mass.)*  
28 2010;21:13-15.  
29  
30
- 31  
32 24. Yusuf S, Joseph P, Rangarajan S, et al. Modifiable risk factors, cardiovascular  
33 disease, and mortality in 155 722 individuals from 21 high-income, middle-income,  
34 and low-income countries (PURE): a prospective cohort study. *Lancet*  
35 2020;395:795-808.  
36  
37
- 38  
39 25. Sundboll J, Horvath-Puho E, Adelborg K, et al. Higher Risk of Vascular Dementia in  
40 Myocardial Infarction Survivors. *Circulation* 2018;137:567-577.  
41  
42
- 43  
44 26. Thygesen SK, Christiansen CF, Christensen S, et al. The predictive value of ICD-10  
45 diagnostic coding used to assess Charlson comorbidity index conditions in the  
46 population-based Danish National Registry of Patients. *BMC Med Res Methodol*  
47 2011;11:83.  
48  
49  
50  
51  
52  
53  
54  
55  
56  
57  
58  
59  
60

1  
2  
3  
4  
5  
6  
7  
8  
9  
10  
11  
12  
13  
14  
15  
16  
17  
18  
19  
20  
21  
22  
23  
24  
25  
26  
27  
28  
29  
30  
31  
32  
33  
34  
35  
36  
37  
38  
39  
40  
41  
42  
43  
44  
45  
46  
47  
48  
49  
50  
51  
52  
53  
54  
55  
56  
57  
58  
59  
60

27. Winkelmayr WC, Schneeweiss S, Mogun H, et al. Identification of individuals with CKD from Medicare claims data: a validation study. *Am J Kidney Dis* 2005;46:225-32.

For peer review only

## LEGENDS

**Figure 1.** Study flow chart.

Cohort of patients with incident kidney disease and individuals of the matched general population comparison cohort during 1995-2016.

**Figure 2.** Cumulative incidences of A) death and B) all-cause dementia in patients with kidney disease (kidney disease cohort) and individuals in a matched population without kidney disease (comparison cohort).

**Figure 3.** Risk of all-cause dementia in patients with kidney disease compared with individuals in a matched population without kidney disease stratified by covariates listed in Table 1.

HR: hazard ratio. 95% CI: 95% confidence interval.



**Table 1.** Characteristics of study cohort at baseline.

|                                                                    | Kidney disease cohort | Comparison cohort |
|--------------------------------------------------------------------|-----------------------|-------------------|
| Number of participants, N                                          | 82,690                | 413,405           |
| Age groups, years                                                  |                       |                   |
| 18-49, N (%)                                                       | 14,718 (17.8)         | 73,530 (17.8)     |
| 50-59, N (%)                                                       | 11,059 (13.4)         | 55,330 (13.4)     |
| 60-74, N (%)                                                       | 29,021 (35.1)         | 145,116 (35.1)    |
| 75-84, N (%)                                                       | 20,381 (24.6)         | 102,063 (24.7)    |
| ≥85, N (%)                                                         | 7,511 (9.1)           | 37,366 (9.0)      |
| Women, %                                                           | 33,589 (40.6)         | 167,914 (40.6)    |
| Calendar period of kidney disease diagnosis                        |                       |                   |
| 1995-2003, N (%)                                                   | 24,410 (29.5)         | 122,013 (29.5)    |
| 2004-2016, N (%)                                                   | 58,280 (70.5)         | 291,392 (70.5)    |
| Any cancer, N (%)                                                  | 10,813 (13.1)         | 36,216 (8.8)      |
| Angina pectoris, N (%)                                             | 17,346 (21.0)         | 38,656 (9.4)      |
| Myocardial infarction, N (%)                                       | 10,303 (12.5)         | 22,061 (5.3)      |
| Stroke, N (%)                                                      | 7,885 (9.5)           | 19,210 (4.6)      |
| Peripheral artery disease, N (%)                                   | 9,673 (11.7)          | 16,109 (3.9)      |
| Venous thromboembolism, N (%)                                      | 3,703 (4.5)           | 9,351 (2.3)       |
| Heart failure, N (%)                                               | 12,154 (14.7)         | 14,370 (3.5)      |
| Heart valve disease, N (%)                                         | 4,700 (5.7)           | 9,080 (2.2)       |
| Atrial fibrillation, N (%)                                         | 10,723 (13.0)         | 24,431 (5.9)      |
| Hypercholesterolemia, N (%)                                        | 32,780 (39.6)         | 85,679 (20.7)     |
| Hypertension, N (%)                                                | 66,500 (80.4)         | 202,597 (49.0)    |
| Obesity, N (%)                                                     | 8,146 (9.9)           | 10,189 (2.5)      |
| Diabetes mellitus, N (%)                                           | 23,271 (28.1)         | 19,159 (4.6)      |
| Chronic obstructive pulmonary disease, N (%)                       | 10,218 (12.4)         | 26,936 (6.5)      |
| Personal gross income during the year preceding the index date     |                       |                   |
| First quartile, N (%)                                              | 21,347 (25.8)         | 91,250 (22.1)     |
| Second quartile, N (%)                                             | 24,556 (29.7)         | 101,853 (24.6)    |
| Third quartile, N (%)                                              | 20,786 (25.1)         | 105,992 (25.6)    |
| Fourth quartile, N (%)                                             | 15,823 (19.1)         | 110,942 (26.8)    |
| Missing, N (%)                                                     | 178 (0.2)             | 3,368 (0.8)       |
| Employment status during the 12-24 months preceding the index date |                       |                   |
| Employed, N (%)                                                    | 22,654 (27.4)         | 147,470 (35.7)    |
| Unemployed, N (%)                                                  | 3,234 (3.9)           | 13,049 (3.2)      |
| Retired, N (%)                                                     | 46,838 (56.6)         | 226,446 (54.8)    |
| Missing, N (%)                                                     | 9,964 (12.1)          | 26,440 (6.3)      |
| Highest education achieved <sup>a</sup>                            |                       |                   |
| Low, N (%)                                                         | 34,928 (42.2)         | 149,632 (36.2)    |
| Medium, N (%)                                                      | 29,666 (35.9)         | 156,227 (37.8)    |
| High, N (%)                                                        | 9,276 (11.2)          | 64,942 (15.7)     |
| Missing, N (%)                                                     | 8,820 (10.7)          | 42,604 (10.3)     |

|                                     |                  |                  |
|-------------------------------------|------------------|------------------|
| Follow-up period, years             |                  |                  |
| Total, years                        | 425,894          | 2,746,040        |
| Median (interquartile range), years | 3.68 (1.54-7.34) | 5.24 (2.39-9.98) |

Values are expressed as numbers, frequencies, median and interquartile values.

<sup>a</sup> Education was categorized as: low (elementary school only), medium (high school and/or academy profession degree) and high (bachelor's, master's or higher degree).

For peer review only

**Table 2.** Risk of all-cause dementia and dementia subtypes in patients with kidney disease compared with individuals in a matched population without kidney disease.

|                                                                                                                                      | Kidney disease cohort |                                        | Comparison cohort  |                                        | Hazard ratios (95 % CI) |                  |  |
|--------------------------------------------------------------------------------------------------------------------------------------|-----------------------|----------------------------------------|--------------------|----------------------------------------|-------------------------|------------------|--|
|                                                                                                                                      | Events/No. at risk    | Crude rate/1,000 person-years (95% CI) | Events/No. at risk | Crude rate/1,000 person-years (95% CI) | Unadjusted              | Adjusted         |  |
| Kidney disease defined as persistent kidney disease, dialysis treatment or kidney transplant (codes listed in Supplemental Table 1). |                       |                                        |                    |                                        |                         |                  |  |
| All-cause dementia                                                                                                                   |                       |                                        |                    |                                        |                         |                  |  |
| 1-5 years follow-up                                                                                                                  | 2,092/82,690          | 9.00 (8.62-9.40)                       | 10,638/413,405     | 8.11 (7.95-8.26)                       | 1.11 (1.06-1.17)        | 1.06 (1.00-1.12) |  |
| 1-10 years follow-up                                                                                                                 | 3,072/82,690          | 8.59 (8.28-8.89)                       | 17,840/413,405     | 8.13 (8.01-8.25)                       | 1.06 (1.02-1.10)        | 1.08 (1.03-1.13) |  |
| 1-22 years follow-up                                                                                                                 | 3,462/82,690          | 8.13 (7.86 -8.40)                      | 21,879/413,405     | 7.97 (7.86-8.07)                       | 1.01 (0.98-1.05)        | 1.08 (1.03-1.12) |  |
| Dementia subtypes, 1-22 years follow-up                                                                                              |                       |                                        |                    |                                        |                         |                  |  |
| Alzheimer's disease                                                                                                                  | 863/82,690            | 2.03 (1.89-2.16)                       | 7,662/413,405      | 2.79 (2.73-2.85)                       | 0.73 (0.68-0.78)        | 0.85 (0.78-0.92) |  |
| Vascular dementia                                                                                                                    | 585/82,690            | 1.37 (1.26-1.49)                       | 2,608/413,405      | 0.95 (0.91-0.99)                       | 1.43 (1.31-1.56)        | 1.26 (1.14-1.40) |  |
| Other dementia                                                                                                                       | 2,014/82,690          | 4.73 (4.52-4.94)                       | 11,609/413,405     | 4.23 (4.15-4.30)                       | 1.11 (1.06-1.16)        | 1.18 (1.11-1.25) |  |
| Alzheimer's disease and other dementia                                                                                               | 2,877/82,690          | 6.76 (6.51-7.01)                       | 19,271/413,405     | 7.02 (6.92-7.12)                       | 0.96 (0.92-1.00)        | 1.04 (1.00-1.09) |  |
| Kidney disease restricted to chronic kidney disease diagnosis only, i.e., ICD-8 code 792 and ICD-10 code DN18.                       |                       |                                        |                    |                                        |                         |                  |  |
| All-cause dementia                                                                                                                   |                       |                                        |                    |                                        |                         |                  |  |
| 1-5 years follow-up                                                                                                                  | 1,232/48,243          | 10.0 (9.47-10.6)                       | 6,689/241,203      | 9.23 (9.01-9.45)                       | 1.09 (1.02-1.16)        | 1.03 (0.96-1.11) |  |
| 1-10 years follow-up                                                                                                                 | 1,646/48,243          | 9.68 (9.22-10.2)                       | 10,564/241,203     | 9.36 (9.18-9.54)                       | 1.04 (0.98-1.09)        | 1.03 (0.97-1.10) |  |
| 1-22 years follow-up                                                                                                                 | 1,739/48,243          | 9.38 (8.95-9.83)                       | 12,172/241,203     | 9.25 (9.09-9.42)                       | 1.01 (0.96-1.06)        | 1.04 (0.98-1.10) |  |

The subtypes of all-cause dementia are mutually exclusive, i.e., only the first diagnosis of any subtype of dementia is considered.

Kidney disease was defined as chronic kidney disease and several other persistent kidney diseases, as well as dialysis treatment or kidney transplant in the definition of kidney disease (Supplemental Table 1).

1  
2 Chronic kidney disease was defined as International Classification of Diseases 8<sup>th</sup> edition (ICD-8) code 792 and 10<sup>th</sup> edition  
3  
4 (ICD-10) code N18.  
5

6  
7 Multifactorially adjusted model included adjustments for covariates listed in Table 1.  
8

9  
10 95% CI: 95% confidence interval. No.: number.  
11

12  
13  
14  
15  
16  
17  
18  
19  
20  
21  
22  
23  
24  
25  
26  
27  
28  
29  
30  
31  
32  
33  
34  
35  
36  
37  
38  
39  
40  
41  
42  
43  
44  
45  
46

For peer review only

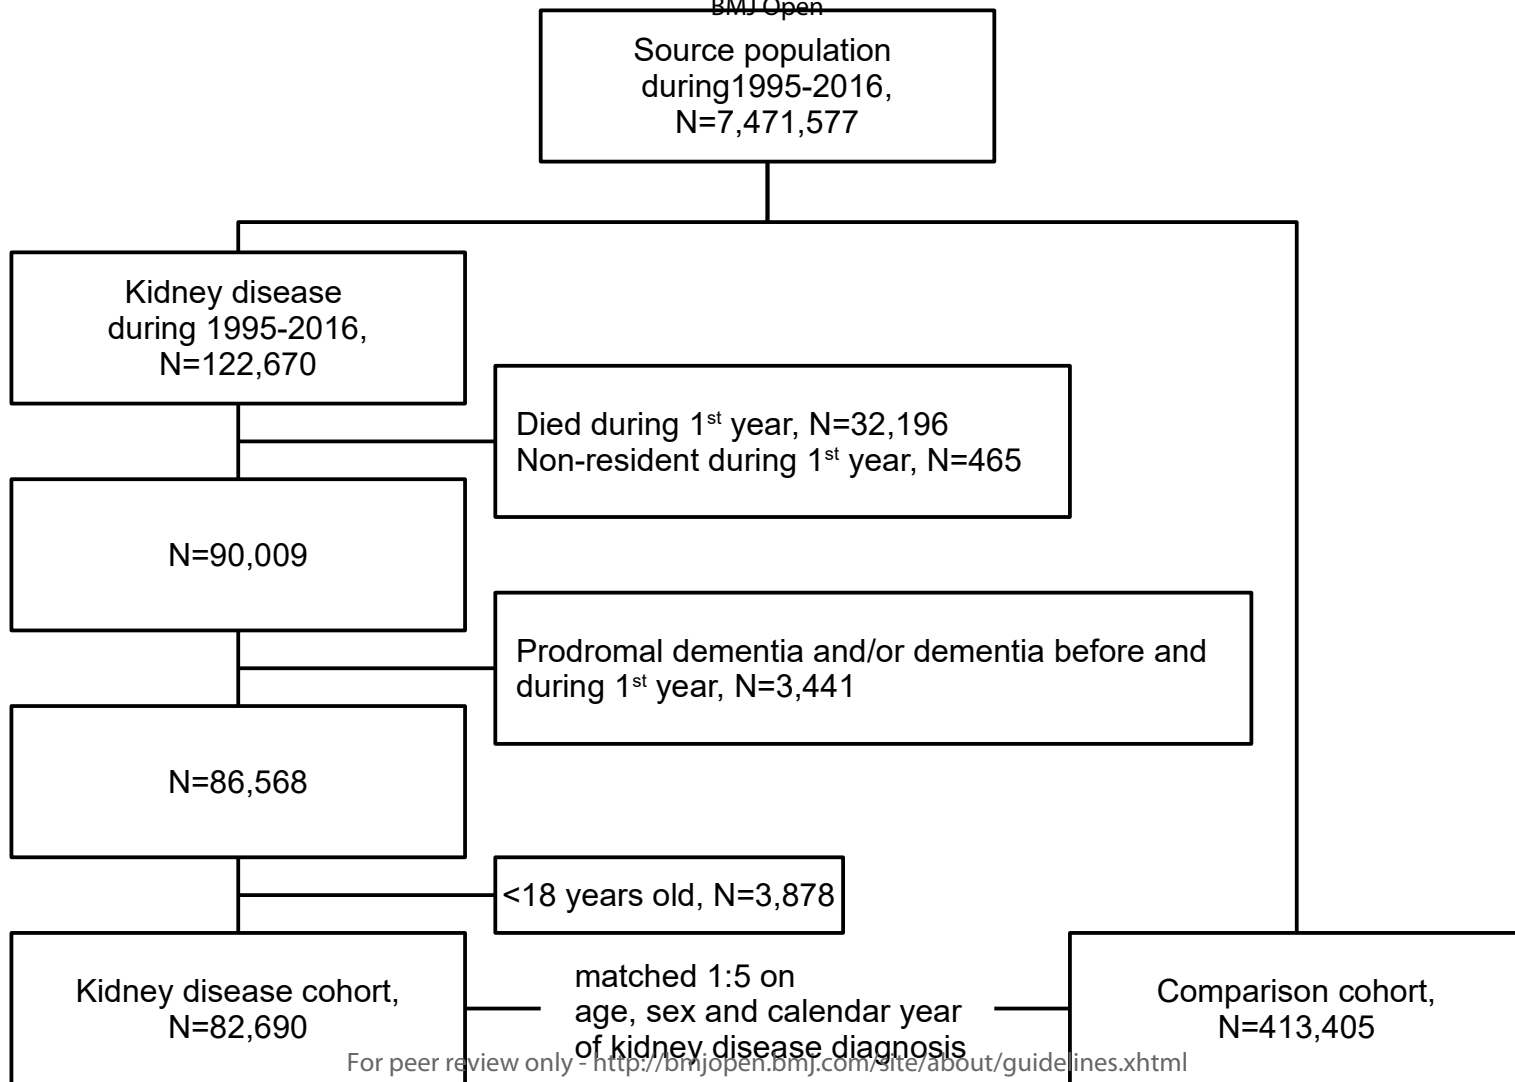

**A**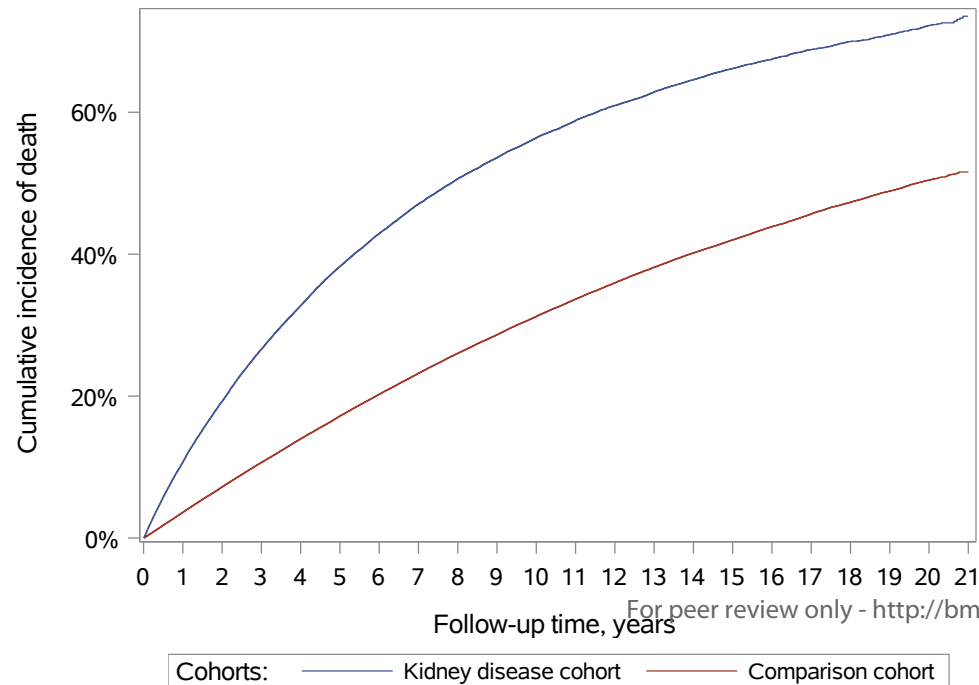**B**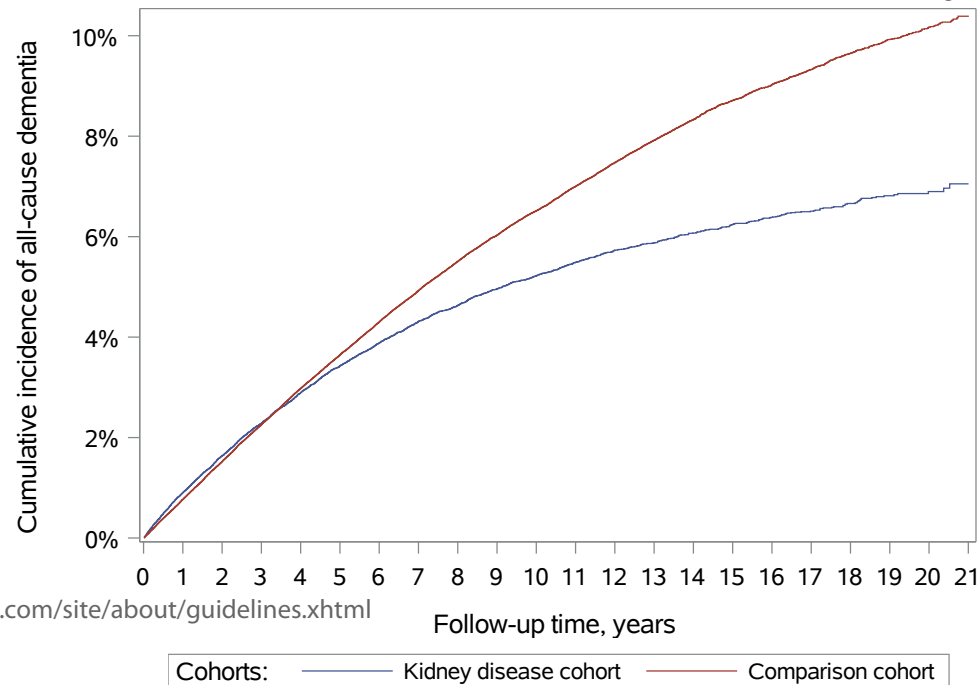

Unadjusted

Adjusted

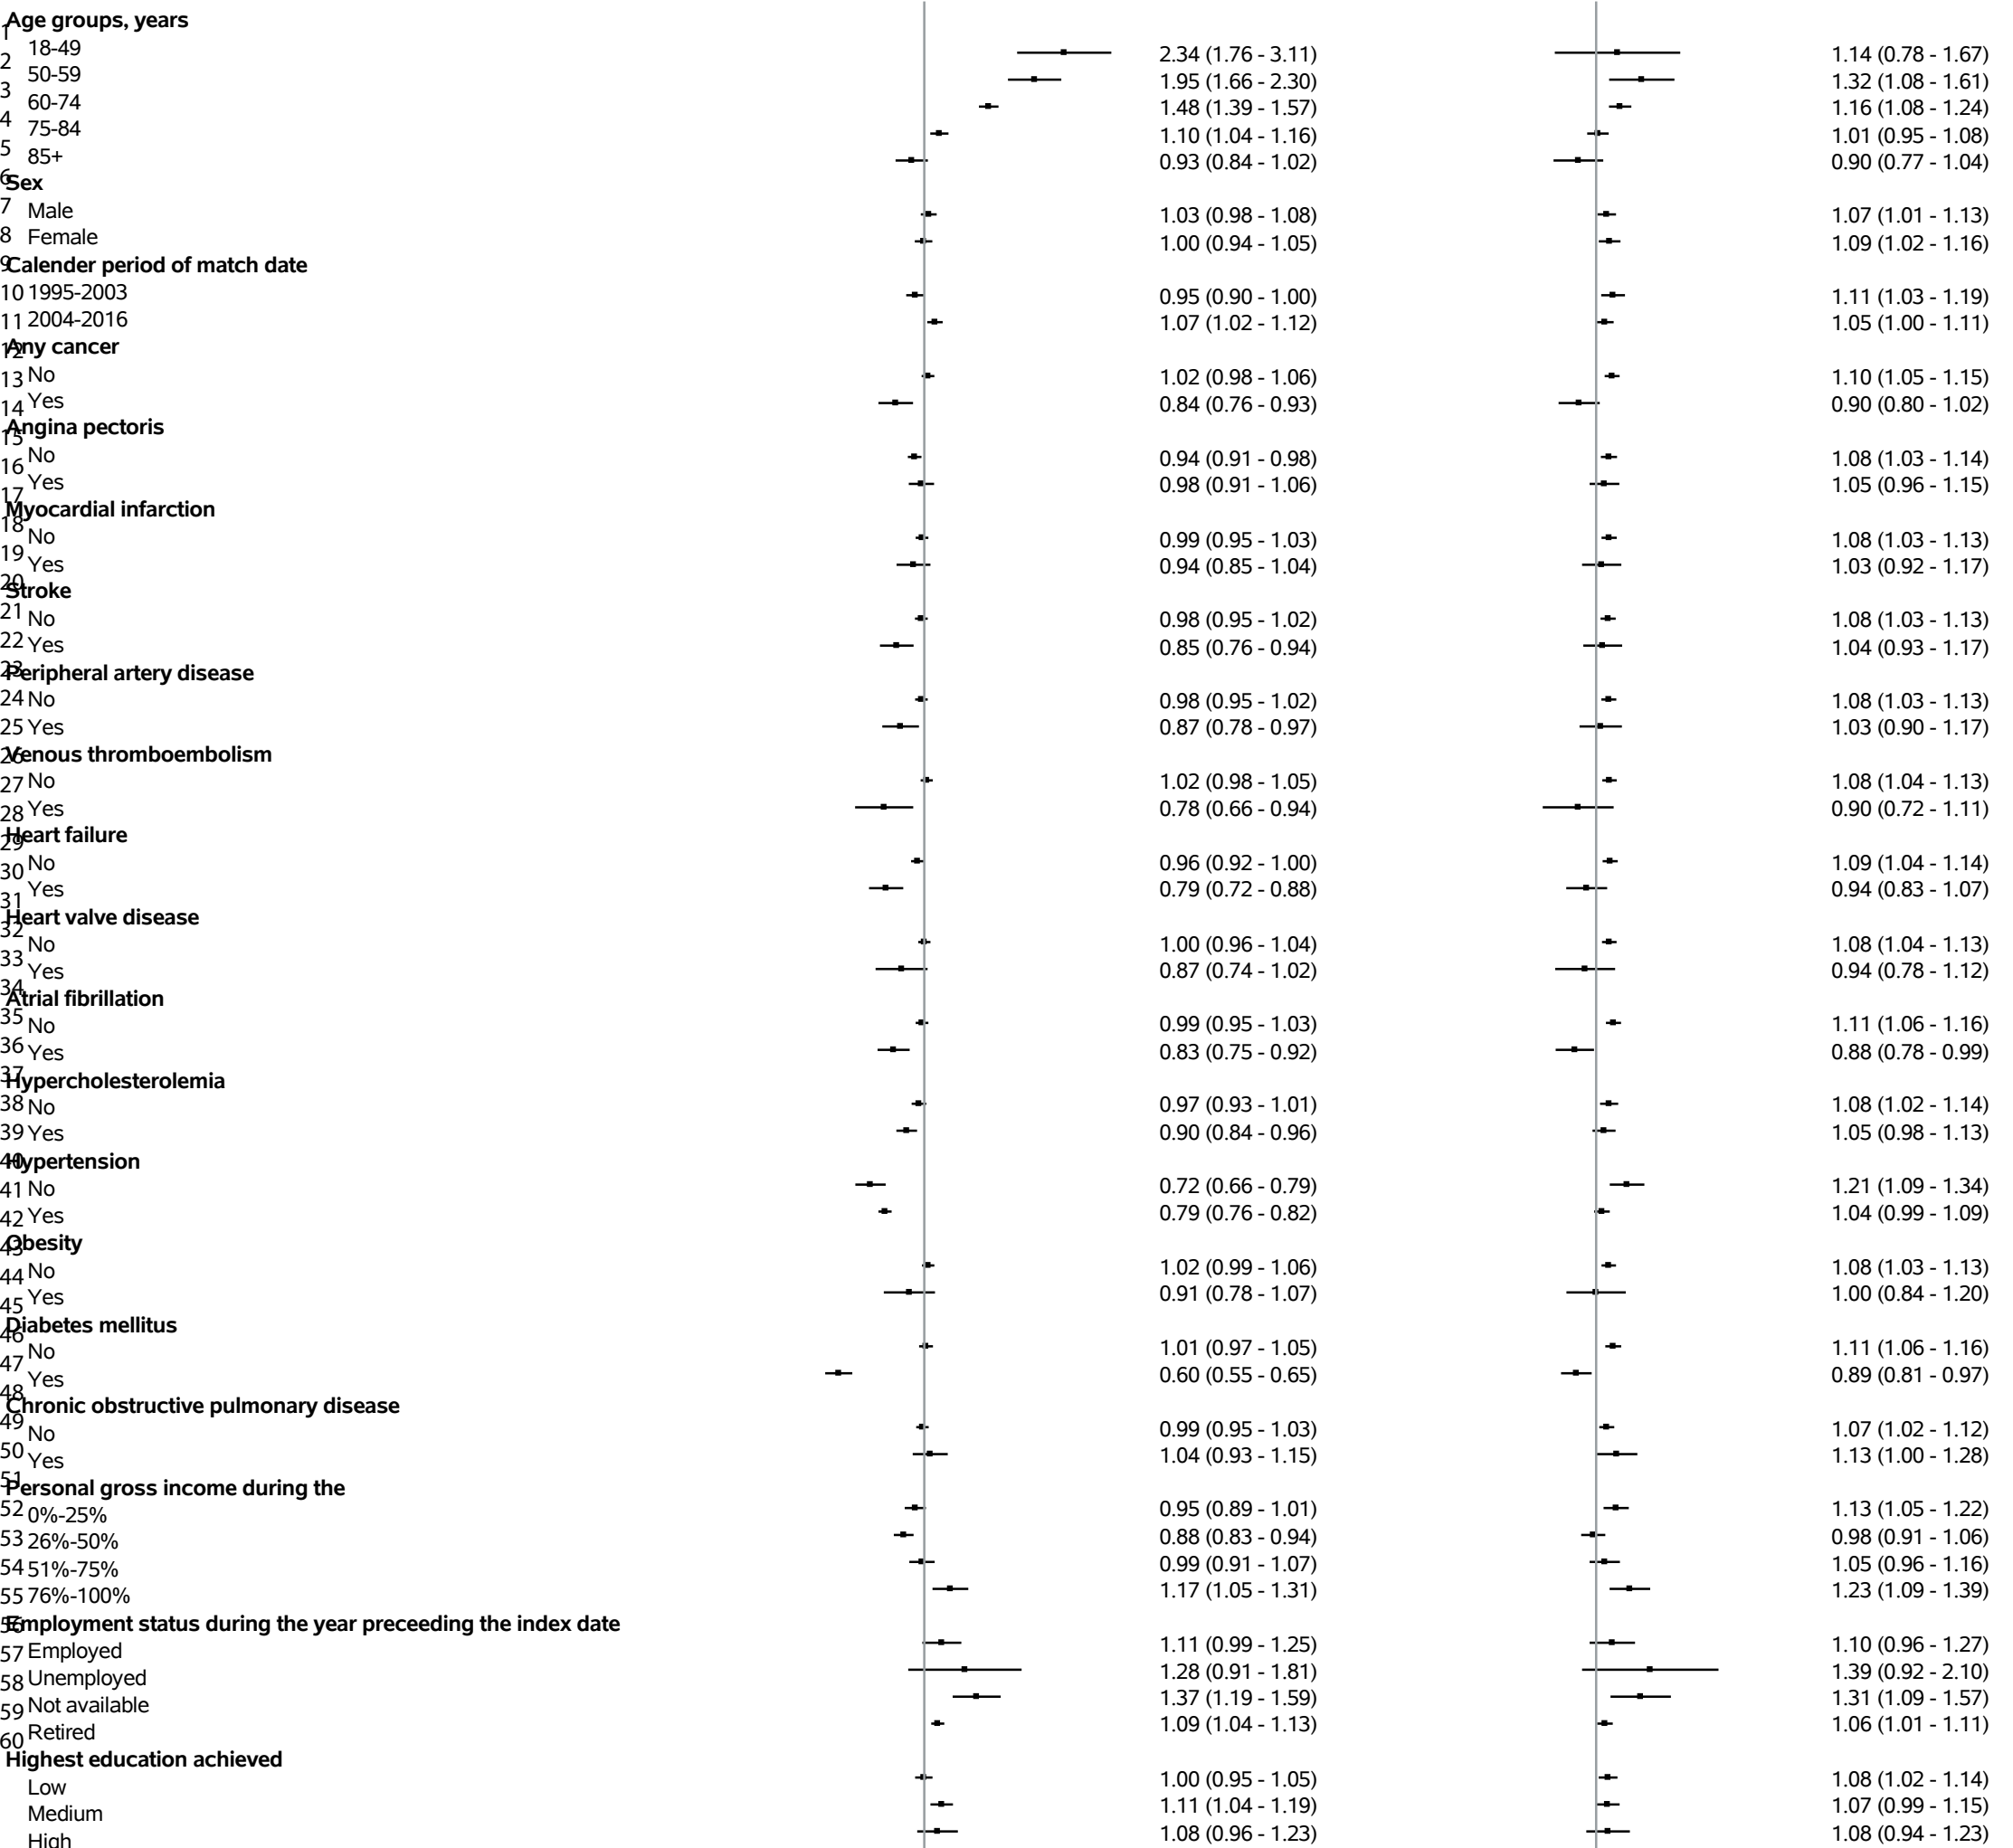

Supplemental Table 1. List of codes for diagnoses, procedures and prescriptions on which definitions of exposure, outcomes and covariates were based.

| Diagnoses and procedures                                                        |                                                        | Cases,<br>first time | Cases,<br>ever | ICD-8 codes                                     | ICD-10 codes                                                                                                                     | Procedur<br>e codes | ATC<br>codes |
|---------------------------------------------------------------------------------|--------------------------------------------------------|----------------------|----------------|-------------------------------------------------|----------------------------------------------------------------------------------------------------------------------------------|---------------------|--------------|
| Kidney disease                                                                  |                                                        |                      |                |                                                 |                                                                                                                                  |                     |              |
| Subtypes of kidney disease                                                      | <b>Chronic kidney disease</b>                          | 41,925               | 58,025         | <b>792</b>                                      | <b>N18</b>                                                                                                                       |                     |              |
|                                                                                 | Diabetic nephropathy                                   | 19,462               | 24,852         | 249.02, 250.02                                  | E102, E112, E132, E142, N08.3                                                                                                    |                     |              |
|                                                                                 | Glomerulonephritis (without nephrotic syndrome)        | 2,240                | 3,719          | 582                                             | N03                                                                                                                              |                     |              |
|                                                                                 | Hereditary nephropathy, not elsewhere classified       | 169                  | 256            | 756.0, 753.3                                    | N07                                                                                                                              |                     |              |
|                                                                                 | Chronic tubulo-interstitial nephritis                  | 2,195                | 2,934          | 590.09, 593.20, 760.4                           | N11                                                                                                                              |                     |              |
|                                                                                 | Glomerular disorders in diseases classified elsewhere  | 338                  | 1,613          |                                                 | N08                                                                                                                              |                     |              |
|                                                                                 | Unspecified kidney failure                             | 15,234               | 26,641         |                                                 | N19                                                                                                                              |                     |              |
|                                                                                 | Hypertensive nephropathy                               | 4,407                | 7,858          | 403, 404                                        | I12, I13                                                                                                                         |                     |              |
|                                                                                 | Albuminuria/proteinuria                                | 1,967                | 2,291          | 789.0                                           | N39.1                                                                                                                            |                     |              |
|                                                                                 | Recurrent and persistent haematuria                    | 3,371                | 3,593          |                                                 | N02                                                                                                                              |                     |              |
|                                                                                 | Renal agenesis and other reductional defects of kidney | 379                  | 437            |                                                 | Q60                                                                                                                              |                     |              |
|                                                                                 | Polycystic kidney disease                              | 2,328                | 2,837          | 753.10-753.19                                   | Q61.1-Q61.4                                                                                                                      |                     |              |
|                                                                                 | Dialysis                                               |                      | 1,918          | 13,872                                          |                                                                                                                                  | Z99.2               |              |
| April 1 1973-December 31 1995                                                   |                                                        |                      |                |                                                 |                                                                                                                                  | 94300,<br>94340     |              |
| <1996                                                                           |                                                        |                      |                |                                                 |                                                                                                                                  | 94350               |              |
| >=1996                                                                          |                                                        |                      |                |                                                 |                                                                                                                                  |                     |              |
| Kidney transplant                                                               |                                                        | 245                  | 2,560          | Y95.09                                          | Z94.0                                                                                                                            |                     |              |
|                                                                                 | 1973-1995                                              |                      |                |                                                 |                                                                                                                                  | 57480,<br>57490     |              |
|                                                                                 | >=1996                                                 |                      |                |                                                 |                                                                                                                                  | KKAS                |              |
| Diagnoses related to dementia (mild cognitive impairment and amnesic syndromes) |                                                        |                      |                | 291.19                                          | F04, F05.1, F06.7, F10.6, F18.6, F19.6                                                                                           |                     |              |
| Outcomes                                                                        |                                                        |                      |                |                                                 |                                                                                                                                  |                     |              |
|                                                                                 | All-cause dementia                                     |                      |                | 290.09, 290.10, 293.09, 293.19, 094.19, 292.09, | F00, G30, G30.0, G30.1, G30.8, G30.9), F01.0x, F01.1x, F01.2x, F01.3x, F01.8X, F01.9x), F02, F03, F1x.73 (F10.73-F19.73); G23.1; |                     |              |



|            |                                       |  |                                                                         |                                                                                      |                    |
|------------|---------------------------------------|--|-------------------------------------------------------------------------|--------------------------------------------------------------------------------------|--------------------|
|            |                                       |  | 290.11, 290.18, 290.19                                                  | G31.0, G31.0A, G31.0B, G31.1, G31.8B, G31.8E, G31.85                                 |                    |
|            | Alzheimer's disease                   |  | 290.09, 290.10                                                          | F00, G30, G30.0, G30.1, G30.8, G30.9                                                 |                    |
|            | Vascular dementia                     |  | 293.09, 293.19                                                          | F01.0x, F01.1x, F01.2x, F01.3x, F01.8X, F01.9x                                       |                    |
|            | Other dementia                        |  | 094.19, 292.09, 290.11, 290.18, 290.19                                  | F02, F03, F10.73-F19.73; G23.1; G31.0, G31.0A, G31.0B, G31.1, G31.8B, G31.8E, G31.85 |                    |
| Covariates |                                       |  |                                                                         |                                                                                      |                    |
|            | Angina pectoris                       |  | 413                                                                     | I20 (except I20.0), I25.1, I25.9                                                     |                    |
|            | Myocardial infarction                 |  | 410                                                                     | I21, I22, I23                                                                        |                    |
|            | Stroke                                |  | 431, 433-434                                                            | I61, I63-I64                                                                         |                    |
|            | Peripheral artery disease             |  | 440-445                                                                 | I70, I71, I72, I73, I74, I77                                                         |                    |
|            | Venous thromboembolism                |  | 451.00, 451.08-09, 451.90, 451.92, 671.01-03, 671.08-09, 450.99, 973.99 | I80.1-I80.3, O22.3, O87.1, I26.0, I26.9, O88.2                                       |                    |
|            | Heart failure                         |  | 42709, 42710, 42711, 42719, 42899, 78249                                | I50, I11.0, I13.0, I13.2                                                             |                    |
|            | Heart valve disease                   |  | 394-398                                                                 | I05, I06, I07, I08.0, I09.8, I34-I37, I39.0, I39.3, I51.1A, Q22                      |                    |
|            | Atrial fibrillation                   |  | 42793, 42794                                                            | I48                                                                                  |                    |
|            | Hypercholesterolemia                  |  | 27200                                                                   | E780                                                                                 | C10                |
|            | Hypertension                          |  | 400-404                                                                 | D110-D115, I67.4                                                                     | C02-C03<br>C07-C09 |
|            | Obesity                               |  | 277                                                                     | E65-E68                                                                              |                    |
|            | Diabetes mellitus                     |  | 249, 250 (excluding 249.02, 250.02)                                     | E10 (excluding E10.2), E11 (excluding E11.2), H36.0                                  |                    |
|            | Chronic obstructive pulmonary disease |  | 490-493, 515-518                                                        | J40-J47; J60-J67; J68.4; J70.1; J70.3; J84.1; J92.0; J96.1; J98.2; J98.3             |                    |
|            | Cancer                                |  | 140-172, 174-194, 200-207                                               | C00-26, C30-34, C37-41, C43, C45-58, C60-76, C80-85, C88, C90-97                     |                    |

**Supplemental Figure 1.** Risk of dementia subtypes in patients with kidney disease compared with individuals in a matched population without kidney disease stratified by covariates listed in Table 1.

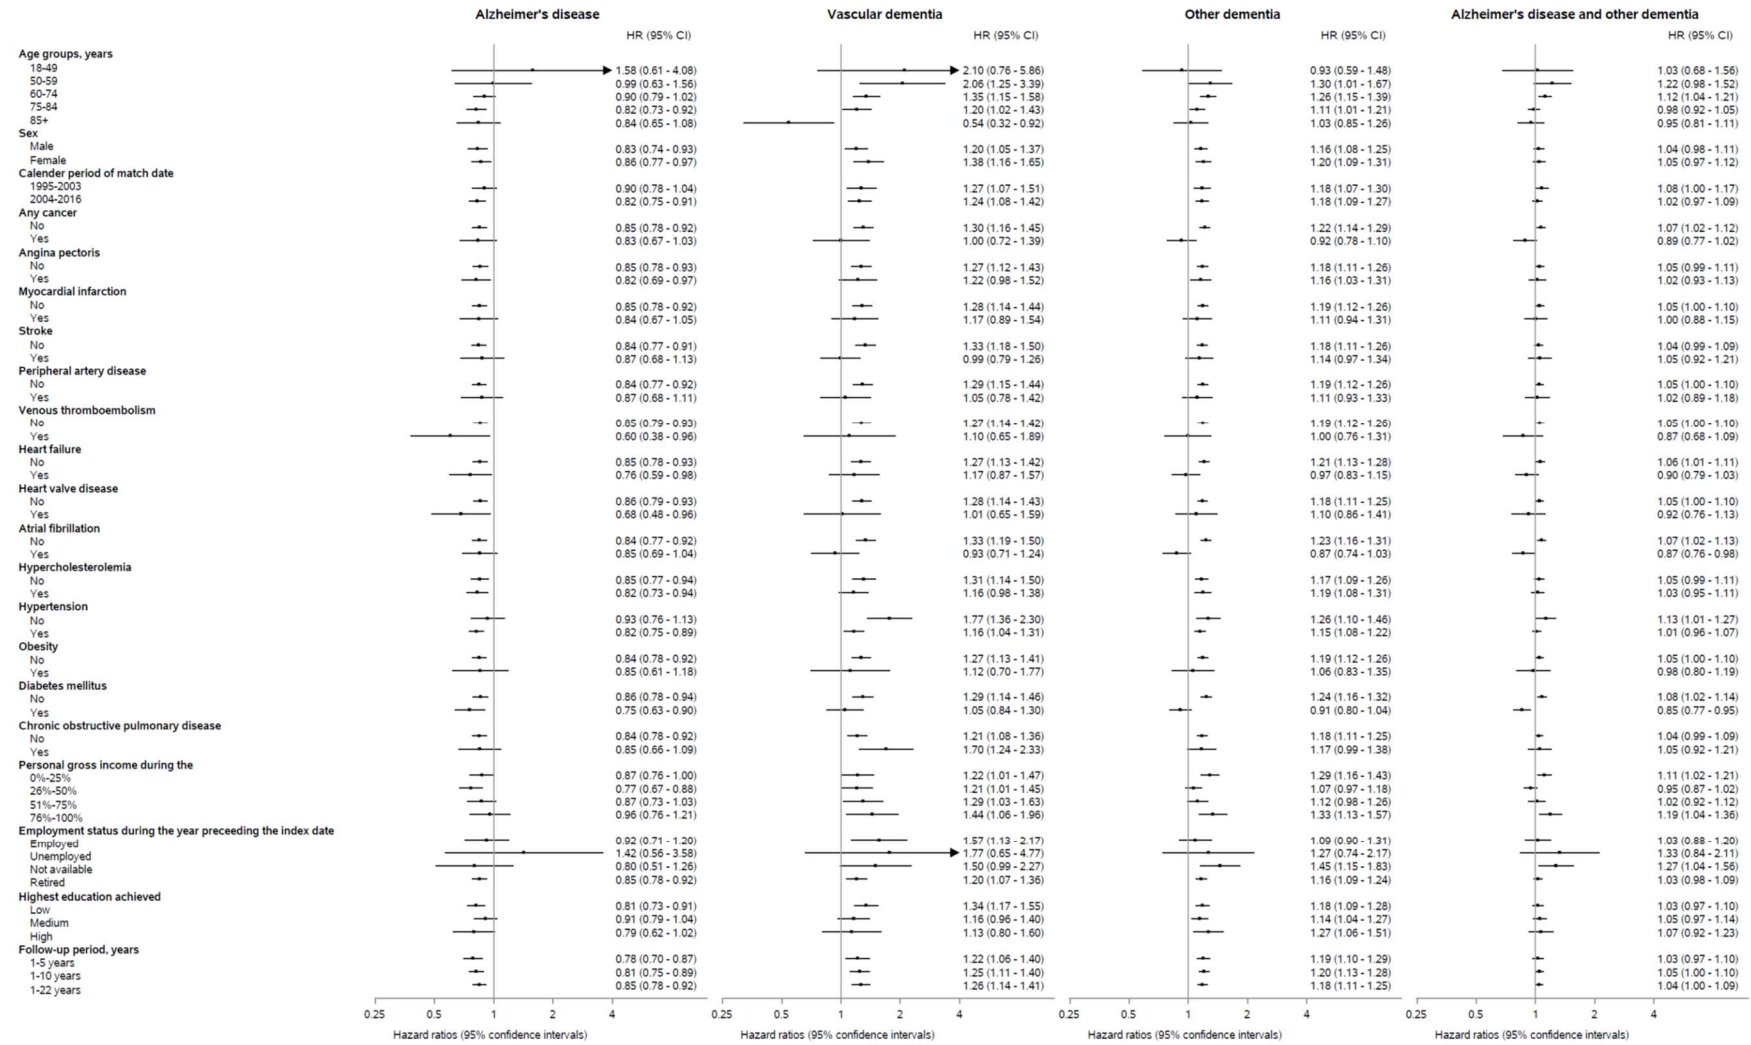

HR: hazard ratio. 95% CI: 95% confidence interval.

**STROBE 2007 (v4) Statement—Checklist of items that should be included in reports of *cohort studies***

| Section/Topic                | Item # | Recommendation                                                                                                                                                                       | Reported on page # |
|------------------------------|--------|--------------------------------------------------------------------------------------------------------------------------------------------------------------------------------------|--------------------|
| <b>Title and abstract</b>    | 1      | (a) Indicate the study's design with a commonly used term in the title or the abstract                                                                                               | 1                  |
|                              |        | (b) Provide in the abstract an informative and balanced summary of what was done and what was found                                                                                  | 2-3                |
| <b>Introduction</b>          |        |                                                                                                                                                                                      |                    |
| Background/rationale         | 2      | Explain the scientific background and rationale for the investigation being reported                                                                                                 | 6                  |
| Objectives                   | 3      | State specific objectives, including any prespecified hypotheses                                                                                                                     | 6                  |
| <b>Methods</b>               |        |                                                                                                                                                                                      |                    |
| Study design                 | 4      | Present key elements of study design early in the paper                                                                                                                              | 7                  |
| Setting                      | 5      | Describe the setting, locations, and relevant dates, including periods of recruitment, exposure, follow-up, and data collection                                                      | 7-10               |
| Participants                 | 6      | (a) Give the eligibility criteria, and the sources and methods of selection of participants. Describe methods of follow-up                                                           | 7                  |
|                              |        | (b) For matched studies, give matching criteria and number of exposed and unexposed                                                                                                  | 7                  |
| Variables                    | 7      | Clearly define all outcomes, exposures, predictors, potential confounders, and effect modifiers. Give diagnostic criteria, if applicable                                             | 7-10               |
| Data sources/<br>measurement | 8*     | For each variable of interest, give sources of data and details of methods of assessment (measurement). Describe comparability of assessment methods if there is more than one group | 7-10               |
| Bias                         | 9      | Describe any efforts to address potential sources of bias                                                                                                                            | 7-11               |
| Study size                   | 10     | Explain how the study size was arrived at                                                                                                                                            |                    |
| Quantitative variables       | 11     | Explain how quantitative variables were handled in the analyses. If applicable, describe which groupings were chosen and why                                                         | 7-11               |
| Statistical methods          | 12     | (a) Describe all statistical methods, including those used to control for confounding                                                                                                | 10-11              |
|                              |        | (b) Describe any methods used to examine subgroups and interactions                                                                                                                  | 10-11              |
|                              |        | (c) Explain how missing data were addressed                                                                                                                                          | 10-11              |
|                              |        | (d) If applicable, explain how loss to follow-up was addressed                                                                                                                       | NA                 |
|                              |        | (e) Describe any sensitivity analyses                                                                                                                                                | 10-11              |
| <b>Results</b>               |        |                                                                                                                                                                                      |                    |

|                          |     |                                                                                                                                                                                                              |                             |
|--------------------------|-----|--------------------------------------------------------------------------------------------------------------------------------------------------------------------------------------------------------------|-----------------------------|
| Participants             | 13* | (a) Report numbers of individuals at each stage of study—eg numbers potentially eligible, examined for eligibility, confirmed eligible, included in the study, completing follow-up, and analysed            | 11                          |
|                          |     | (b) Give reasons for non-participation at each stage                                                                                                                                                         | 11                          |
|                          |     | (c) Consider use of a flow diagram                                                                                                                                                                           | Figure 1                    |
| Descriptive data         | 14* | (a) Give characteristics of study participants (eg demographic, clinical, social) and information on exposures and potential confounders                                                                     | Table 1                     |
|                          |     | (b) Indicate number of participants with missing data for each variable of interest                                                                                                                          | Table 1                     |
|                          |     | (c) Summarise follow-up time (eg, average and total amount)                                                                                                                                                  | 11-12                       |
| Outcome data             | 15* | Report numbers of outcome events or summary measures over time                                                                                                                                               | 11-12                       |
| Main results             | 16  | (a) Give unadjusted estimates and, if applicable, confounder-adjusted estimates and their precision (eg, 95% confidence interval). Make clear which confounders were adjusted for and why they were included | 11-13<br>Figures and Tables |
|                          |     | (b) Report category boundaries when continuous variables were categorized                                                                                                                                    | Figures and Tables          |
|                          |     | (c) If relevant, consider translating estimates of relative risk into absolute risk for a meaningful time period                                                                                             | NA                          |
| Other analyses           | 17  | Report other analyses done—eg analyses of subgroups and interactions, and sensitivity analyses                                                                                                               | 11-13                       |
| <b>Discussion</b>        |     |                                                                                                                                                                                                              |                             |
| Key results              | 18  | Summarise key results with reference to study objectives                                                                                                                                                     | 13                          |
| <b>Limitations</b>       |     |                                                                                                                                                                                                              |                             |
| Interpretation           | 20  | Give a cautious overall interpretation of results considering objectives, limitations, multiplicity of analyses, results from similar studies, and other relevant evidence                                   | 13-16                       |
| Generalisability         | 21  | Discuss the generalisability (external validity) of the study results                                                                                                                                        | 13-16                       |
| <b>Other information</b> |     |                                                                                                                                                                                                              |                             |
| Funding                  | 22  | Give the source of funding and the role of the funders for the present study and, if applicable, for the original study on which the present article is based                                                | 4                           |

\*Give information separately for cases and controls in case-control studies and, if applicable, for exposed and unexposed groups in cohort and cross-sectional studies.

**Note:** An Explanation and Elaboration article discusses each checklist item and gives methodological background and published examples of transparent reporting. The STROBE checklist is best used in conjunction with this article (freely available on the Web sites of PLoS Medicine at <http://www.plosmedicine.org/>, Annals of Internal Medicine at <http://www.annals.org/>, and Epidemiology at <http://www.epidem.com/>). Information on the STROBE Initiative is available at [www.strobe-statement.org](http://www.strobe-statement.org).

# BMJ Open

## Kidney disease and risk of dementia: a Danish nationwide cohort study

|                                 |                                                                                                                                                                                                                                                                                                                                                                                       |
|---------------------------------|---------------------------------------------------------------------------------------------------------------------------------------------------------------------------------------------------------------------------------------------------------------------------------------------------------------------------------------------------------------------------------------|
| Journal:                        | <i>BMJ Open</i>                                                                                                                                                                                                                                                                                                                                                                       |
| Manuscript ID                   | bmjopen-2021-052652.R1                                                                                                                                                                                                                                                                                                                                                                |
| Article Type:                   | Original research                                                                                                                                                                                                                                                                                                                                                                     |
| Date Submitted by the Author:   | 12-Aug-2021                                                                                                                                                                                                                                                                                                                                                                           |
| Complete List of Authors:       | Kjaergaard, Alisa; Aarhus University Hospital, Steno Diabetes Center Aarhus<br>Johannesen, Benjamin; Aarhus University Hospital, Clinical Epidemiology<br>Sørensen, Henrik T.; Aarhus University Hospital, Department of Clinical Epidemiology<br>Henderson, Victor; Stanford University,<br>Christiansen, Christian; Aarhus University Hospital, Department of Clinical Epidemiology |
| <b>Primary Subject Heading</b>: | Epidemiology                                                                                                                                                                                                                                                                                                                                                                          |
| Secondary Subject Heading:      | Geriatric medicine, Mental health, Renal medicine                                                                                                                                                                                                                                                                                                                                     |
| Keywords:                       | EPIDEMIOLOGY, Nephrology < INTERNAL MEDICINE, Dementia < NEUROLOGY, Kidney & urinary tract disorders < UROLOGY                                                                                                                                                                                                                                                                        |
|                                 |                                                                                                                                                                                                                                                                                                                                                                                       |

SCHOLARONE™  
Manuscripts



I, the Submitting Author has the right to grant and does grant on behalf of all authors of the Work (as defined in the below author licence), an exclusive licence and/or a non-exclusive licence for contributions from authors who are: i) UK Crown employees; ii) where BMJ has agreed a CC-BY licence shall apply, and/or iii) in accordance with the terms applicable for US Federal Government officers or employees acting as part of their official duties; on a worldwide, perpetual, irrevocable, royalty-free basis to BMJ Publishing Group Ltd ("BMJ") its licensees and where the relevant Journal is co-owned by BMJ to the co-owners of the Journal, to publish the Work in this journal and any other BMJ products and to exploit all rights, as set out in our [licence](#).

The Submitting Author accepts and understands that any supply made under these terms is made by BMJ to the Submitting Author unless you are acting as an employee on behalf of your employer or a postgraduate student of an affiliated institution which is paying any applicable article publishing charge ("APC") for Open Access articles. Where the Submitting Author wishes to make the Work available on an Open Access basis (and intends to pay the relevant APC), the terms of reuse of such Open Access shall be governed by a Creative Commons licence – details of these licences and which [Creative Commons](#) licence will apply to this Work are set out in our licence referred to above.

Other than as permitted in any relevant BMJ Author's Self Archiving Policies, I confirm this Work has not been accepted for publication elsewhere, is not being considered for publication elsewhere and does not duplicate material already published. I confirm all authors consent to publication of this Work and authorise the granting of this licence.

## Kidney disease and risk of dementia: a Danish nationwide cohort study

Short title: Kidney disease and dementia

Alisa D. Kjaergaard <sup>a, b</sup>, PhD ; Benjamin R. Johannesen <sup>a</sup>, PhD; Henrik T. Sørensen <sup>a, c</sup>,  
DMSci; Victor W. Henderson <sup>a, d</sup> MD; Christian F. Christiansen <sup>a</sup>, PhD

<sup>a</sup> Department of Clinical Epidemiology, Aarhus University Hospital, DK-8200 Aarhus,  
Denmark

<sup>b</sup> Steno Diabetes Center Aarhus, Aarhus University Hospital, DK-8200 Aarhus, Denmark

<sup>c</sup> Excellence Research Center, Stanford University, Stanford, CA, USA

<sup>d</sup> Departments of Epidemiology and Population Health and of Neurology and Neurological  
Sciences, Stanford University, Stanford, CA, USA

### Corresponding author:

Alisa D. Kjaergaard MD, PhD

alisa.kjaergaard@auh.rm.dk, alisa@devedzic.dk, phone: +45 61667297

Hedeager 3, Steno Diabetes Center Aarhus, Aarhus University Hospital, Denmark

**Word count** (Introduction-Discussion): 3,191; Abstract: 256

Tables: 2; Figures: 3; Supplemental tables: 1; Supplemental figures: 2

## ABSTRACT

**Objectives:** It is unclear whether kidney disease is a risk factor for developing dementia.

We examined the association between kidney disease and risk of future dementia.

**Design and setting:** Nationwide historical registry-based cohort study in Denmark based on data from January 1, 1995 until December 31, 2016.

**Participants:** All patients diagnosed with kidney disease and matched general population cohort without kidney disease (matched 1:5 on age, sex and year of kidney disease diagnosis).

**Primary and secondary outcome measures:** All-cause dementia and its subtypes: Alzheimer's disease, vascular dementia and other specified or unspecified dementia. We computed five-year cumulative incidences (risk) and hazard ratios (HRs) for outcomes using Cox regression analyses.

**Results:** The study cohort comprised 82,690 patients with kidney disease and 413,405 individuals from the general population. Five- and ten-year mortality rates were twice as high in patients with kidney disease compared to the general population. The five-year risk for all-cause dementia was 2.90% (95% confidence interval: 2.78%-3.08%) in patients with kidney disease and 2.98% (2.92%-3.04%) in the general population. Compared to the general population, the adjusted HRs for all-cause dementia in patients with kidney disease were 1.06 (1.00-1.12) for the five-year follow-up and 1.08 (1.03-1.12) for the entire study period. Risk estimates for dementia subtypes differed substantially and were lower for Alzheimer's disease and higher for vascular dementia.



1  
2  
3  
4 **Conclusions:** Patients diagnosed with kidney disease have a modestly increased rate of  
5  
6 dementia, mainly driven by vascular dementia. Moreover, patients with kidney disease  
7  
8 may be underdiagnosed with dementia due to high mortality and other comorbidities of  
9  
10 higher priority.  
11  
12  
13  
14  
15  
16

## 17 **Article summary**

### 20 **Strengths and limitations of this study (5 bullet points on methods):**

- 23 • This is the first European population-based study examining the association  
24 between hospital-diagnosed kidney disease and risk of future dementia.  
25
- 26 • We conducted a nationwide registry-based cohort study of all Danish residents with  
27 kidney disease and a 1:5 matched general population comparison cohort without  
28 kidney disease during a study period from 1995-2016.  
29
- 30 • We did not have data on albuminuria or estimated glomerular filtration rate.  
31
- 32 • Not all individuals with kidney disease or dementia are hospital-diagnosed and thus  
33 captured in the Danish registries.  
34
- 35 • Results pertaining to dementia subtypes should be interpreted cautiously due to  
36 potential differential misclassification of dementia subtypes, particularly among  
37 patients with kidney disease  
38  
39  
40  
41  
42  
43  
44  
45  
46  
47  
48  
49  
50  
51  
52

## 53 **Contributors**

54  
55  
56  
57  
58  
59  
60

BRJ and CFC had full access to all of the data in the study and take responsibility for the integrity of the data and accuracy of the data analysis. ADK and CFC are guarantors of the study.

Concept and design: ADK, BRJ, HTS, VWF and CFC. Statistical analysis: BRJ. Drafting of the manuscript: ADK. Supervision: CFC. Interpretation and critical revision of the manuscript for important intellectual content: ADK, BRJ, HTS, VWF and CFC.

### **Acknowledgement**

We thank Thomas Bøjer Rasmussen for valuable contributions to the discussion on study design and statistical analyses.

### **Funding**

This work was supported by a grant from the Lundbeck Foundation (grant no. R248-2017-521) and from the Independent Research Fund Denmark (grant no. 0134-00407B). ADK is funded by an unrestricted grant from Novo Nordisk (grant no. N/A). VWH is funded by a National Institutes of Health grant (grantno. P30AG066615).

The funding sources had no role in the design, conduct, analysis or reporting of this study.

### **Competing interests**

The authors have no conflicts of interest to declare. The Department of Clinical Epidemiology, Aarhus University Hospital, receives funding for other studies from companies in the form of research grants to (and administered by) Aarhus University.

### **Patient consent for publication/Ethics approval**

1  
2  
3  
4 The study was registered at Aarhus University (record number 2016-051-000001/603) as  
5  
6 mandated by the Danish Data Protection Agency. According to Danish legislation, registry-  
7  
8 based studies do not require ethical review board approval or informed consent from the  
9  
10 participants  
11  
12

### 13 14 **Data availability statement**

15  
16  
17 Data was accessed at secure servers, and cannot be shared due to Danish legislation.  
18  
19  
20  
21  
22  
23  
24  
25  
26  
27  
28  
29  
30  
31  
32  
33  
34  
35  
36  
37  
38  
39  
40  
41  
42  
43  
44  
45  
46  
47  
48  
49  
50  
51  
52  
53  
54  
55  
56  
57  
58  
59  
60

## INTRODUCTION

Dementia is a common, progressive age-related neurological disorder diagnosed when acquired cognitive impairment has become severe enough to compromise social and/or occupational functioning.<sup>1</sup> Although the incidence rates of dementia have decreased modestly over the last 30 years, the prevalence of dementia is increasing worldwide, likely due to increased life expectancy.<sup>2</sup> This has enormous costs for the individuals and families affected, as well as the health care and society.<sup>3</sup>

Kidney disease is another disorder with a high (close to 10%) and increasing prevalence, partly due to ageing population, and increased incidence rates of hypertension and diabetes mellitus.<sup>4</sup>

Kidney disease and dementia share risk factors such as increasing age, hypertension, diabetes mellitus, hyperlipidemia, and the pathophysiology of small vessel disease.<sup>5, 6</sup> One potential link between kidney disease and dementia could be common susceptibility of kidney and brain tissue to vascular injury.<sup>7</sup> Kidney disease is associated with oxidative stress, chronic inflammation and changes in coagulation, and it might also affect the brain or cerebral vasculature indirectly or directly through metabolic derangements and uremic toxins.<sup>7</sup>

A previous population-based study in Taiwan found a hazard ratio (HR) of 1.41 for all-cause dementia in patients with a diagnosis of kidney disease (N=37,049) compared to the general population (N=74,098).<sup>8</sup> However, these findings may not be applicable to European populations, and the Taiwanese study did not examine potential differences across dementia subtypes. Furthermore, previous studies, where kidney disease was defined as persistent albuminuria or estimated glomerular filtration rate (eGFR) below 60 ml/min/1.73 m<sup>2</sup>, reported mixed results.<sup>9-13</sup> Thus, whether kidney disease is associated

1  
2  
3  
4 with risk of dementia is presently uncertain. We investigated this for all-cause dementia  
5  
6 and dementia subtypes (Alzheimer's disease, vascular dementia and other dementia) in a  
7  
8 nationwide cohort study.  
9

## 10 11 12 13 **METHODS**

14  
15 We followed the STROBE guidelines for reporting of cohort studies in epidemiology.  
16

### 17 *Study cohort*

18  
19 We conducted a nationwide cohort study of all Danish patients with hospital-diagnosed  
20  
21 kidney disease and a matched general population comparison cohort without kidney  
22  
23 disease during a study period from January 1, 1995 until December 31, 2016.  
24  
25

26  
27 A flow chart of the study cohort is shown in figure 1. We identified 122,670 patients with a  
28  
29 first-time kidney disease diagnosis recorded during the study period. Next, we excluded  
30  
31 patients who died (N=32,196) or did not reside in Denmark (N=465) during the first year  
32  
33 after kidney disease diagnosis. Further exclusion criteria were diagnosis of dementia  
34  
35 (N=1,909) and prodromal signs of dementia, i.e., mild cognitive impairment and amnesic  
36  
37 syndrome (N=303) before kidney disease diagnosis. Additionally, we excluded patients  
38  
39 diagnosed with dementia (N=1,300) and prodromal signs of dementia (N=156) during first  
40  
41 year after a kidney disease diagnosis, because dementia diagnosed in this period is  
42  
43 unlikely to be a consequence of kidney disease. Finally, we limited the cohort to adult  
44  
45 patients aged 18 and above. The remaining 82,690 patients comprised our kidney disease  
46  
47 cohort. For each patient in the kidney disease cohort, up to five individuals from the  
48  
49 general population without a kidney disease diagnosis prior to index date were randomly  
50  
51 selected and matched on age (birth year), sex and calendar year of index date, i.e., date of  
52  
53 kidney disease diagnosis. Matching was performed as individual matching with  
54  
55  
56  
57  
58  
59  
60

1  
2  
3  
4 replacement.<sup>14</sup> The general population comparison cohort comprised 413,405 individuals,  
5  
6 who were alive and had no dementia, mild cognitive impairment, amnestic syndrome or  
7  
8 kidney disease prior to study entry.  
9

### 10 11 *Diagnoses*

12  
13 Diagnoses of kidney disease (exposure), dementia (outcome), mild cognitive impairment,  
14  
15 amnestic syndrome and covariates were based on diagnoses obtained from the Danish  
16  
17 National Patient Registry and/or the Danish Psychiatric Central Research Registry. These  
18  
19 registries, covering all Danish hospitals, have recorded hospital admissions since 1977  
20  
21 and 1969 respectively, as well as outpatient specialist clinic visits since 1995.<sup>15-17</sup> We used  
22  
23 all primary and secondary discharge diagnoses for all hospitalizations and outpatient clinic  
24  
25 visits, but not emergency room visits (as diagnoses in this setting may be tentative and  
26  
27 thus less valid). Diagnoses were identified according to the World Health Organization's  
28  
29 International Classification of Diseases 8<sup>th</sup> edition (ICD-8) until the end of 1993 and 10<sup>th</sup>  
30  
31 edition (ICD-10) thereafter (supplemental table 1). We used the date of hospital admission  
32  
33 or start of outpatient clinic follow-up as the date for all diagnoses.  
34  
35  
36  
37

### 38 39 *Kidney disease*

40  
41 In the main analysis, we used an extended definition of kidney disease including chronic  
42  
43 kidney disease as well as several other persistent kidney diseases, dialysis treatment and  
44  
45 kidney transplant (for ICD codes, see supplemental table 1). Importantly, this extended  
46  
47 kidney disease definition did not include acute and/or potentially reversible kidney injury. In  
48  
49 a sensitivity analysis, we used chronic kidney disease (restricted to ICD-8 792 and ICD-10  
50  
51 N18) as the exposure for all-cause dementia only. KDIGO (Kidney Disease Improving  
52  
53 Global Outcomes) defines chronic kidney as persistent (>3 months) eGFR <60  
54  
55 ml/min/1.73 m<sup>2</sup> or kidney damage, often ascertained by the presence of albuminuria.<sup>18</sup>  
56  
57  
58  
59  
60

## *Dementia*

The validity of all-cause dementia is high with a positive predictive value of 86% in the Danish registries.<sup>19</sup> Dementia subtypes were mutually exclusive, and we only used the first coded dementia subtype: Alzheimer's disease, vascular dementia and other (specified or unspecified) dementia, the latter comprising the majority of dementia diagnoses (for ICD codes, see supplemental table 1). As about one third of cases with other dementia without specification may be attributable to Alzheimer's disease,<sup>19</sup> we also included a combined outcome of Alzheimer's disease and other dementia.

## *Covariates*

We identified cardiovascular disease (CVD), CVD risk factors, (any) cancer and socioeconomic status as potential confounders due to their reported associations with kidney disease and dementia (listed in table 1).<sup>5, 6, 20</sup> All covariates were assessed prior to study entry. CVD covariates were angina pectoris, myocardial infarction, stroke, peripheral arterial disease, venous thromboembolism, heart failure, heart valve disease and atrial fibrillation. Covariates related to CVD risk factors were hypercholesterolemia, hypertension, obesity, diabetes mellitus, and chronic obstructive pulmonary disease as a proxy for smoking. CVD risk factors were based on diagnoses from the Danish National Patient Registry and additionally on prescriptions of lipid lowering and antihypertensive drugs (see Anatomical Therapeutic Chemical codes in supplemental table 1) from the Danish National Prescription Registry, containing detailed individual-level data on prescriber, patient and products for all outpatient prescriptions dispensed since 1995.<sup>21</sup> Covariates related to socioeconomic status were highest education achieved, personal gross income and employment status obtained from the Integrated Database for Labor Market Research, established in 1981.<sup>22</sup> Education was categorized as: low (elementary

1  
2  
3  
4 school only), medium (high school and/or academy profession degree) and high  
5  
6 (bachelor's, master's or higher degree). Personal gross income was categorized in  
7  
8 quartiles. Employment status was categorized as: employed, retired and unemployed. We  
9  
10 used employment status during the 12-24 months preceding the study entry, since  
11  
12 employment status during the year prior to kidney disease diagnosis is likely to  
13  
14 underestimate the peak employment status.  
15  
16

### 17 *Patient and public involvement*

18  
19  
20  
21 No patients involved.  
22  
23

### 24 *Statistical analysis*

25  
26 We compared cumulative incidence (risk) of death as well as all-cause dementia (taking  
27  
28 the competing risk of death into account) for the kidney disease and comparison cohorts.  
29  
30 Hazard ratios for all-cause dementia and dementia subtypes and their corresponding 95%  
31  
32 confidence intervals (CIs) were calculated using Cox regression analyses with time-on-  
33  
34 study as the time scale. Proportional hazards assumption was tested graphically by log-log  
35  
36 plots, and no violations were detected (supplemental figure 1). Age, sex and calendar year  
37  
38 of index date were already controlled for in the unadjusted Cox model, as these were the  
39  
40 matching criteria. However, to account for the matching methodology and due to the built-  
41  
42 in selection bias (see Discussion) as the matching could not be completely retained, the  
43  
44 adjusted Cox model therefore included adjustments for age (age groups listed in table 1),  
45  
46 sex and calendar year of index date, as well as other potential confounders (as listed in  
47  
48 table 1). Participants with missing values (<1% of personal gross income and <11% of  
49  
50 employment status and education level each) were excluded from the adjusted analyses.  
51  
52 Participants were followed from one year after index date until a diagnosis of dementia or  
53  
54 censoring at December 31, 2016, emigration or death, whichever came first. Thus, the  
55  
56  
57  
58  
59  
60



1  
2  
3  
4 minimum follow-up time was one year and maximum 22 years. Because all diagnoses and  
5  
6 vital and emigration status are registered in national registries, we had no losses to follow-  
7  
8 up.

9  
10 We performed predefined stratification analyses for age (18-49, 50-59, 60-74, 75-84 and  
11  
12 >85 years), sex, calendar year of index date (1995-2003 or 2004-2016), CVD, CVD risk  
13  
14 factors, socioeconomic factors and follow-up time (1-5 years, 1-10 years and 1-22 years).  
15  
16 Finally, in order to assess whether the risk of all-cause dementia was linked to kidney  
17  
18 disease severity, we stratified the kidney disease cohort by presence or absence of kidney  
19  
20 failure (defined as receiving dialysis treatment and/or kidney transplant, for codes see  
21  
22 supplemental table 1).  
23  
24

25  
26 All analyses were performed using SAS version 9.4 (SAS Institute Inc., Cary, NC, USA).  
27  
28

### 29 *Ethics*

30  
31  
32 The study was registered at Aarhus University (record number 2016-051-000001/603) as  
33  
34 mandated by the Danish Data Protection Agency. According to Danish legislation, registry-  
35  
36 based studies do not require ethical review board approval or informed consent from the  
37  
38 participants.  
39  
40  
41  
42  
43  
44  
45

## 46 **RESULTS**

47  
48  
49 The study cohort consisted of a kidney disease cohort of 82,690 patients with kidney  
50  
51 disease and a comparison cohort of 413,405 matched individuals from the general  
52  
53 population without kidney disease. The median age was 69 years (interquartile range: 56-  
54  
55 78 years). Women comprised 41% of all participants, and 71% were enrolled during 2004-  
56  
57 2016 and the remaining 29% during 1995-2003 (table 1). Diagnoses of CVD and CVD risk  
58  
59  
60

1  
2  
3  
4 factors were much more frequent in the kidney disease cohort than in the comparison  
5 cohort (table 1). Furthermore, the kidney disease cohort had lower income, higher  
6 unemployment rate and lower education than the comparison cohort (table 1). Finally, the  
7 follow-up time was shorter for the kidney disease cohort than for the comparison cohort,  
8 with a median of 3.7 and 5.2 years, respectively (table 1). This difference reflects a higher  
9 mortality rate in the kidney disease than the comparison cohort: 5- and 10-year mortality  
10 was twice as high in patients with kidney disease compared to the general population  
11 (figure 2). During the study period, 466,071 (94%) participants died, 78,555 (95%) from the  
12 kidney disease cohort and 387,516 (94%) from the comparison cohort.

#### 25 *Kidney disease and risk of developing dementia*

26  
27  
28  
29 During follow-up, 3,462 (4.19% of 82,690) patients with kidney disease and 21,879 (5.29%  
30 of 413,405) individuals from the comparison cohort developed dementia, the majority  
31 classified as other dementia (table 2). Alzheimer's disease was more frequent in the  
32 comparison cohort, and vascular dementia in the kidney disease cohort (table 2).

33  
34  
35  
36  
37  
38  
39 The 5-, 10-, and 22-year risks of all-cause dementia were lower in patients with kidney  
40 disease than in the general population: 2.90% (95% CI: 2.78%-3.08%), 4.96% (4.79%-  
41 5.14%) and 7.05% (6.70%-7.41%) for the kidney disease cohort and 2.98% (2.92%-  
42 3.04%), 6.03% (5.94%-6.12%) and 10.39% (10.17%-10.60%) for the comparison cohort  
43 (figure 2).

44  
45  
46  
47  
48  
49  
50  
51 The estimates for dementia subtypes were lowest for Alzheimer's disease and highest for  
52 vascular dementia (table 2).

1  
2  
3  
4 The adjusted HR (aHR) for all-cause dementia was stable over time. 1.06 (1.00-1.12) for  
5  
6 up to 5 years of follow-up, 1.08 (1.03-1.13) for up to 10 years of follow-up and 1.08 (1.03-  
7  
8 1.12) for up to 22 years of follow-up (table 2). When we restricted the kidney disease  
9  
10 exposure to chronic kidney disease only, the aHR for all-cause dementia was 1.04 (0.98-  
11  
12 1.10) for up to 22 years of follow-up and very similar for shorter follow-up (table 2).  
13  
14  
15

16  
17 In analyses stratified by age, there was a stepwise decrease in HRs of all-cause dementia  
18  
19 with increasing age: the aHRs for 18-49, 50-59, 60-74, 75-84 and  $\geq 85$  years age groups  
20  
21 were 1.14 (0.78-1.67), 1.32 (1.09-1.61), 1.16 (1.08-1.24), 1.01 (0.95-1.08) and 0.90 (0.77-  
22  
23 1.04), respectively. The rate of all-cause dementia did not differ by sex, calendar year of  
24  
25 index date or socioeconomic factors. Kidney disease was also associated with increased  
26  
27 HR for dementia in most CVD subgroups (myocardial infarction, stroke, peripheral arterial  
28  
29 disease, venous thromboembolism, heart failure and heart valve disease) and CVD risk  
30  
31 factors (atrial fibrillation, hypertension, obesity and diabetes mellitus), but estimates were  
32  
33 imprecise (figure 3). Results for dementia subtypes showed consistent results  
34  
35 (supplemental figure 2).  
36  
37  
38  
39

#### 40 *Kidney disease severity and risk of developing dementia*

41  
42  
43 In the kidney disease cohort, fewer patients with end-stage kidney disease developed  
44  
45 dementia during follow-up compared with other patients with kidney disease: 3.3% (61 out  
46  
47 of 1,866) of patients with dialysis treatment or kidney transplant and 4.2% (3,401 out of  
48  
49 80,982) of patients without these interventions.  
50  
51  
52  
53  
54  
55

## 56 **DISCUSSION**

57  
58  
59  
60

1  
2  
3  
4 In this nationwide study of nearly 500,000 participants, we found that being diagnosed with  
5 kidney disease is associated with a modestly increased risk of future dementia. When we  
6 restricted the exposure to chronic kidney disease only, the association was similar.  
7  
8

9  
10  
11 We found substantially smaller estimates than the only previous population-based study,  
12 where investigators in Taiwan found an HR of 1.41 (1.32-1.50) for all-cause dementia in  
13 patients with kidney disease compared to the general population.<sup>8</sup> This may partly be  
14 explained by differences between these Asian and European populations, study design  
15 differences or both. Our study included more recent data, five times as many participants,  
16 finer age matching and a longer follow-up period. Furthermore, we included dialysis  
17 treatment, kidney transplantation and hypertensive nephropathy in our kidney disease  
18 definition, and we did not exclude participants based on other kidney-related diagnoses. In  
19 contrast, the Taiwanese study excluded patients with these and several other kidney-  
20 related diagnoses. Thus, our study likely included relatively more patients with severe  
21 kidney disease in the kidney disease cohort and mild kidney disease in the comparison  
22 cohort. Finally, while we excluded patients who were diagnosed with dementia within one  
23 year after kidney disease diagnosis, the Taiwanese study did not do this, and in this  
24 population, the incidence rate ratio for less than two years of follow-up was substantially  
25 higher than the incidence rate ratio for two or more years of follow-up.<sup>8</sup>  
26  
27  
28  
29  
30  
31  
32  
33  
34  
35  
36  
37  
38  
39  
40  
41  
42  
43  
44  
45  
46

47 A meta-analysis of cross-sectional and cohort studies including more than 50,000  
48 participants showed an association between kidney disease (eGFR<60 ml/min/1.73 m<sup>2</sup>)  
49 and cognitive impairment.<sup>13</sup> The cognitive domains that were predominantly affected (i.e.,  
50 orientation, attention, concept formation and reasoning) differed from those affected by  
51 dementia, suggesting that kidney disease may be more closely linked with other cognitive  
52  
53  
54  
55  
56  
57  
58  
59  
60

1  
2  
3  
4 impairment than with dementia. Unfortunately, we did not have data on cognitive  
5 performance.<sup>21, 22</sup>  
6  
7  
8

9  
10 Interestingly, studies that mainly included eGFR measurements within the normal range  
11 showed a stronger association between albuminuria and dementia than between eGFR  
12 and dementia.<sup>9-12, 23</sup> This finding suggests that albuminuria may be a better marker than  
13 eGFR of more advanced kidney disease. Unfortunately, we did not have data on  
14 albuminuria or eGFR.  
15  
16  
17  
18  
19

20  
21  
22 The lack of a strong association between kidney disease and dementia may possibly be  
23 explained in part by survivor bias due to very high mortality among patients with kidney  
24 disease.<sup>24</sup> As dementia increases with age, patients with kidney disease may not survive  
25 long enough to develop dementia. Indeed, the fraction of participants diagnosed with  
26 dementia was lower in patients with severe than mild kidney disease (3.3% of patients with  
27 dialysis treatment or kidney transplant versus 4.2% of patients without these  
28 interventions). This finding may reflect survivor bias or might suggest that clinicians are  
29 more likely to underdiagnose dementia in the presence of life-threatening illness and  
30 reduced life expectancy (detection bias). This inference is further supported by our  
31 stratification analyses, that show lower risk estimates in the presence of CVD, e.g.,  
32 myocardial infarction, and CVD risk factors known to be associated with increased  
33 mortality.<sup>25</sup> In contrast, a previous Danish study of 314,911 patients with myocardial  
34 infarction matched with 1,573,193 individuals from the general population reported that  
35 myocardial infarction was associated with higher risk of vascular dementia but not with risk  
36 of all-cause dementia or other subtypes.<sup>26</sup> Taken together, these findings suggest a  
37 possible misclassification bias for dementia subtypes as clinicians may be more likely to  
38  
39  
40  
41  
42  
43  
44  
45  
46  
47  
48  
49  
50  
51  
52  
53  
54  
55  
56  
57  
58  
59  
60

1  
2  
3  
4  
5  
6  
7  
8  
9  
10  
11  
12  
13  
14  
15  
16  
17  
18  
19  
20  
21  
22  
23  
24  
25  
26  
27  
28  
29  
30  
31  
32  
33  
34  
35  
36  
37  
38  
39  
40  
41  
42  
43  
44  
45  
46  
47  
48  
49  
50  
51  
52  
53  
54  
55  
56  
57  
58  
59  
60

diagnose vascular dementia, and less likely Alzheimer's disease, in patients with dementia and kidney disease or myocardial infarction than in individuals without these diseases.

Since HRs may change over time, the observed modest association between kidney disease and dementia may be limited to the first few years after a kidney disease diagnosis. On the other hand, the period-specific HRs are prone to a built-in selection bias.<sup>24</sup> In our study, this translates to preferential censoring of patients, due to death, from the kidney disease cohort in the beginning of follow-up. With increasing follow-up time, this can lead to a relative increase in the proportion of individuals susceptible to dementia in the comparison cohort and thereby explain why the unadjusted HRs attenuated with increasing follow-up time. Due to this built-in selection bias, the matching could not be retained, and for this reason we included matching covariates in our adjusted analysis. This can possibly explain why the unadjusted HRs attenuated, while the aHRs did not attenuate with increasing follow-up time. The major strength of our study is its design: large nationwide registry-based cohort study with individual-level data and a complete follow-up on all Danish patients with hospital-diagnosed kidney disease and a matched general population comparison cohort without kidney disease during a study period from 1995-2016.

Limitations of our study include selection, survival and surveillance bias. As we did not perform multiple imputations for income, employment status and education level, the exclusion of participants with missing values may have biased our estimates. However, this would only bias the estimates if the missing values were not random. The unbiased estimates may be even larger if the missing values are linked to lower levels of income, employment and education. Further limitations are misclassification bias (of kidney disease, dementia and covariates), unmeasured or residual confounding, quality of coding

1  
2  
3  
4 and validity of diagnoses. The positive predictive value of kidney disease coded in the  
5 Danish National Patient Registry has been reported to be 100%, whereas completeness  
6 may only be 37%; i.e., not all individuals with kidney disease are captured.<sup>27-29</sup> While the  
7 positive predictive value of all-cause dementia and Alzheimer's disease in the Danish  
8 National Patient Registry is 86% and 81%, respectively, it is lower for other dementia  
9 subtypes.<sup>19</sup> Thus, the results pertaining to dementia subtypes should be interpreted  
10 cautiously. This caveat is particularly important since our results are compatible with  
11 differential misclassification of dementia subtypes among patients with kidney disease,  
12 where vascular risk factors are especially common, and the general population, where  
13 vascular risk is lower. Furthermore, we used the date of hospital admission or start of  
14 outpatient clinic follow-up as the date for all diagnoses since the exact day is not available.  
15 This may have introduced a bias, particularly in the beginning of the follow-up. Additionally,  
16 there is a variable lag time between dementia onset and the date of diagnosis. Finally,  
17 since all diagnoses are recorded by hospital physicians, mild kidney disease and mild  
18 dementia treated only by a general practitioner would not be recorded unless they were  
19 also assessed in the hospital or an outpatient clinic setting.

20  
21  
22  
23  
24  
25  
26  
27  
28  
29  
30  
31  
32  
33  
34  
35  
36  
37  
38  
39  
40  
41  
42 In conclusion, patients diagnosed with kidney disease have a modestly increased risk of  
43 being diagnosed with future dementia. This association is mainly driven by diagnoses of  
44 vascular dementia, and it may be limited to the first few years after the kidney disease  
45 diagnosis. On the other hand, patients with kidney disease may be underdiagnosed with  
46 dementia due to high mortality and other comorbidities of higher priority, and the true risk  
47 of future dementia may be somewhat higher than our study suggests.  
48  
49  
50  
51  
52  
53  
54  
55  
56  
57  
58  
59  
60

## REFERENCES

1. Arvanitakis Z, Shah RC, Bennett DA. Diagnosis and Management of Dementia: Review. *JAMA* 2019;322:1589-1599.
2. Knopman DS. The Enigma of Decreasing Dementia Incidence. *JAMA Network Open* 2020;3:e2011199-e2011199.
3. World Alzheimer Report 2015: the Global Impact of Dementia: An Analysis of Prevalence, Incidence, Cost and Trends. Volume 2020. <https://www.alz.co.uk/research/WorldAlzheimerReport2015.pdf>, 2015.
4. Global, regional, and national burden of chronic kidney disease, 1990-2017: a systematic analysis for the Global Burden of Disease Study 2017. *Lancet* 2020;395:709-733.
5. Barnes DE, Yaffe K. The projected effect of risk factor reduction on Alzheimer's disease prevalence. *Lancet Neurol* 2011;10:819-28.
6. Ikram MA, Vernooij MW, Hofman A, et al. Kidney function is related to cerebral small vessel disease. *Stroke* 2008;39:55-61.
7. Bugnicourt JM, Godefroy O, Chillon JM, et al. Cognitive disorders and dementia in CKD: the neglected kidney-brain axis. *J Am Soc Nephrol* 2013;24:353-63.
8. Cheng KC, Chen YL, Lai SW, et al. Patients with chronic kidney disease are at an elevated risk of dementia: a population-based cohort study in Taiwan. *BMC Nephrol* 2012;13:129.
9. Deckers K, Camerino I, van Boxtel MP, et al. Dementia risk in renal dysfunction: A systematic review and meta-analysis of prospective studies. *Neurology* 2017;88:198-208.



- 1  
2  
3  
4 10. Gabin JM, Romundstad S, Saltvedt I, et al. Moderately increased albuminuria,  
5  
6 chronic kidney disease and incident dementia: the HUNT study. *BMC Nephrol*  
7  
8 2019;20:261.  
9
- 10  
11 11. Takae K, Hata J, Ohara T, et al. Albuminuria Increases the Risks for Both  
12  
13 Alzheimer Disease and Vascular Dementia in Community-Dwelling Japanese  
14  
15 Elderly: The Hisayama Study. *J Am Heart Assoc* 2018;7.  
16
- 17  
18 12. Paterson EN, Williams MA, Passmore P, et al. Estimated Glomerular Filtration Rate  
19  
20 is not Associated with Alzheimer's Disease in a Northern Ireland Cohort. *J*  
21  
22 *Alzheimers Dis* 2017;60:1379-1385.  
23
- 24  
25 13. Berger I, Wu S, Masson P, et al. Cognition in chronic kidney disease: a systematic  
26  
27 review and meta-analysis. *BMC Medicine* 2016;14:206.  
28
- 29  
30 14. Heide-Jørgensen U, Adelborg K, Kahlert J, et al. Sampling strategies for selecting  
31  
32 general population comparison cohorts. *Clin Epidemiol* 2018;10:1325-1337.  
33
- 34  
35 15. Mors O, Perto GP, Mortensen PB. The Danish Psychiatric Central Research  
36  
37 Register. *Scand J Public Health* 2011;39:54-7.  
38
- 39  
40 16. Schmidt M, Schmidt SA, Sandegaard JL, et al. The Danish National Patient  
41  
42 Registry: a review of content, data quality, and research potential. *Clin Epidemiol*  
43  
44 2015;7:449-90.  
45
- 46  
47 17. Schmidt M, Schmidt SAJ, Adelborg K, et al. The Danish health care system and  
48  
49 epidemiological research: from health care contacts to database records. *Clin*  
50  
51 *Epidemiol* 2019;11:563-591.  
52
- 53  
54 18. Levey AS, de Jong PE, Coresh J, et al. The definition, classification, and prognosis  
55  
56 of chronic kidney disease: a KDIGO Controversies Conference report. *Kidney Int*  
57  
58 2011;80:17-28.  
59  
60

1  
2  
3  
4  
5  
6  
7  
8  
9  
10  
11  
12  
13  
14  
15  
16  
17  
18  
19  
20  
21  
22  
23  
24  
25  
26  
27  
28  
29  
30  
31  
32  
33  
34  
35  
36  
37  
38  
39  
40  
41  
42  
43  
44  
45  
46  
47  
48  
49  
50  
51  
52  
53  
54  
55  
56  
57  
58  
59  
60

19. Phung TK, Andersen BB, Høgh P, et al. Validity of dementia diagnoses in the Danish hospital registers. *Dement Geriatr Cogn Disord* 2007;24:220-8.
20. Webster AC, Nagler EV, Morton RL, et al. Chronic Kidney Disease. *Lancet* 2017;389:1238-1252.
21. Pottegård A, Schmidt SAJ, Wallach-Kildemoes H, et al. Data Resource Profile: The Danish National Prescription Registry. *Int J Epidemiol* 2017;46:798-798f.
22. Petersson F, Baadsgaard M, Thygesen LC. Danish registers on personal labour market affiliation. *Scand J Public Health* 2011;39:95-8.
23. Guerville F, De Souto Barreto P, Coley N, et al. Kidney Function and Cognitive Decline in Older Adults: Examining the Role of Neurodegeneration. *J Am Geriatr Soc* 2020.
24. Hernán MA. The hazards of hazard ratios. *Epidemiology (Cambridge, Mass.)* 2010;21:13-15.
25. Yusuf S, Joseph P, Rangarajan S, et al. Modifiable risk factors, cardiovascular disease, and mortality in 155 722 individuals from 21 high-income, middle-income, and low-income countries (PURE): a prospective cohort study. *Lancet* 2020;395:795-808.
26. Sundboll J, Horvath-Puho E, Adelborg K, et al. Higher Risk of Vascular Dementia in Myocardial Infarction Survivors. *Circulation* 2018;137:567-577.
27. Thygesen SK, Christiansen CF, Christensen S, et al. The predictive value of ICD-10 diagnostic coding used to assess Charlson comorbidity index conditions in the population-based Danish National Registry of Patients. *BMC Med Res Methodol* 2011;11:83.

- 1  
2  
3  
4 28. Winkelmayr WC, Schneeweiss S, Mogun H, et al. Identification of individuals with  
5  
6 CKD from Medicare claims data: a validation study. Am J Kidney Dis 2005;46:225-  
7  
8 32.  
9  
10  
11 29. Vestergaard SV, Christiansen CF, Thomsen RW, et al. Identification of Patients with  
12  
13 CKD in Medical Databases. A Comparison of Different Algorithms 2021;16:543-551.  
14  
15  
16  
17  
18  
19  
20  
21  
22  
23  
24  
25  
26  
27  
28  
29  
30  
31  
32  
33  
34  
35  
36  
37  
38  
39  
40  
41  
42  
43  
44  
45  
46  
47  
48  
49  
50  
51  
52  
53  
54  
55  
56  
57  
58  
59  
60

For peer review only

1  
2  
3  
4  
5  
6  
7  
8  
9  
10  
11  
12  
13  
14  
15  
16  
17  
18  
19  
20  
21  
22  
23  
24  
25  
26  
27  
28  
29  
30  
31  
32  
33  
34  
35  
36  
37  
38  
39  
40  
41  
42  
43  
44  
45  
46  
47  
48  
49  
50  
51  
52  
53  
54  
55  
56  
57  
58  
59  
60

## LEGENDS

**Figure 1.** Study flow chart.

Cohort of patients with incident kidney disease and individuals of the matched general population comparison cohort during 1995-2016.

**Figure 2.** Cumulative incidences of A) death and B) all-cause dementia in patients with kidney disease (kidney disease cohort) and individuals in a matched population without kidney disease (comparison cohort).

**Figure 3.** Risk of all-cause dementia in patients with kidney disease compared with individuals in a matched population without kidney disease stratified by covariates listed in table 1.

HR: hazard ratio. CI: confidence interval.

**Table 1.** Characteristics of study cohort at baseline.

|                                                                    | Kidney disease cohort | Comparison cohort |
|--------------------------------------------------------------------|-----------------------|-------------------|
| Number of participants, N                                          | 82,690                | 413,405           |
| Age groups, years                                                  |                       |                   |
| 18-49, N (%)                                                       | 14,718 (17.8)         | 73,530 (17.8)     |
| 50-59, N (%)                                                       | 11,059 (13.4)         | 55,330 (13.4)     |
| 60-74, N (%)                                                       | 29,021 (35.1)         | 145,116 (35.1)    |
| 75-84, N (%)                                                       | 20,381 (24.6)         | 102,063 (24.7)    |
| ≥85, N (%)                                                         | 7,511 (9.1)           | 37,366 (9.0)      |
| Women, %                                                           | 33,589 (40.6)         | 167,914 (40.6)    |
| Calendar period of kidney disease diagnosis                        |                       |                   |
| 1995-2003, N (%)                                                   | 24,410 (29.5)         | 122,013 (29.5)    |
| 2004-2016, N (%)                                                   | 58,280 (70.5)         | 291,392 (70.5)    |
| Any cancer, N (%)                                                  | 10,813 (13.1)         | 36,216 (8.8)      |
| Angina pectoris, N (%)                                             | 17,346 (21.0)         | 38,656 (9.4)      |
| Myocardial infarction, N (%)                                       | 10,303 (12.5)         | 22,061 (5.3)      |
| Stroke, N (%)                                                      | 7,885 (9.5)           | 19,210 (4.6)      |
| Peripheral artery disease, N (%)                                   | 9,673 (11.7)          | 16,109 (3.9)      |
| Venous thromboembolism, N (%)                                      | 3,703 (4.5)           | 9,351 (2.3)       |
| Heart failure, N (%)                                               | 12,154 (14.7)         | 14,370 (3.5)      |
| Heart valve disease, N (%)                                         | 4,700 (5.7)           | 9,080 (2.2)       |
| Atrial fibrillation, N (%)                                         | 10,723 (13.0)         | 24,431 (5.9)      |
| Hypercholesterolemia, N (%)                                        | 32,780 (39.6)         | 85,679 (20.7)     |
| Hypertension, N (%)                                                | 66,500 (80.4)         | 202,597 (49.0)    |
| Obesity, N (%)                                                     | 8,146 (9.9)           | 10,189 (2.5)      |
| Diabetes mellitus, N (%)                                           | 23,271 (28.1)         | 19,159 (4.6)      |
| Chronic obstructive pulmonary disease, N (%)                       | 10,218 (12.4)         | 26,936 (6.5)      |
| Personal gross income during the year preceding the index date     |                       |                   |
| First quartile, N (%)                                              | 21,347 (25.8)         | 91,250 (22.1)     |
| Second quartile, N (%)                                             | 24,556 (29.7)         | 101,853 (24.6)    |
| Third quartile, N (%)                                              | 20,786 (25.1)         | 105,992 (25.6)    |
| Fourth quartile, N (%)                                             | 15,823 (19.1)         | 110,942 (26.8)    |
| Missing, N (%)                                                     | 178 (0.2)             | 3,368 (0.8)       |
| Employment status during the 12-24 months preceding the index date |                       |                   |
| Employed, N (%)                                                    | 22,654 (27.4)         | 147,470 (35.7)    |
| Unemployed, N (%)                                                  | 3,234 (3.9)           | 13,049 (3.2)      |
| Retired, N (%)                                                     | 46,838 (56.6)         | 226,446 (54.8)    |
| Missing, N (%)                                                     | 9,964 (12.1)          | 26,440 (6.3)      |
| Highest education achieved <sup>a</sup>                            |                       |                   |
| Low, N (%)                                                         | 34,928 (42.2)         | 149,632 (36.2)    |
| Medium, N (%)                                                      | 29,666 (35.9)         | 156,227 (37.8)    |
| High, N (%)                                                        | 9,276 (11.2)          | 64,942 (15.7)     |
| Missing, N (%)                                                     | 8,820 (10.7)          | 42,604 (10.3)     |

|                                     |                  |                  |
|-------------------------------------|------------------|------------------|
| Follow-up period, years             |                  |                  |
| Total, years                        | 425,894          | 2,746,040        |
| Median (interquartile range), years | 3.68 (1.54-7.34) | 5.24 (2.39-9.98) |

Values are expressed as numbers, frequencies, median and interquartile values.

<sup>a</sup>Education was categorized as: low (elementary school only), medium (high school and/or academy profession degree) and high (bachelor's, master's or higher degree).

For peer review only

**Table 2.** Risk of all-cause dementia and dementia subtypes in patients with kidney disease compared with individuals in a matched population without kidney disease.

|                                                                                                                                      | Kidney disease cohort |                                        | Comparison cohort  |                                        | Hazard ratios (95 % CI) |                  |  |
|--------------------------------------------------------------------------------------------------------------------------------------|-----------------------|----------------------------------------|--------------------|----------------------------------------|-------------------------|------------------|--|
|                                                                                                                                      | Events/No. at risk    | Crude rate/1,000 person-years (95% CI) | Events/No. at risk | Crude rate/1,000 person-years (95% CI) | Unadjusted              | Adjusted         |  |
| Kidney disease defined as persistent kidney disease, dialysis treatment or kidney transplant (codes listed in supplemental table 1). |                       |                                        |                    |                                        |                         |                  |  |
| All-cause dementia                                                                                                                   |                       |                                        |                    |                                        |                         |                  |  |
| 1-5 years follow-up                                                                                                                  | 2,092/82,690          | 9.00 (8.62-9.40)                       | 10,638/413,405     | 8.11 (7.95-8.26)                       | 1.11 (1.06-1.17)        | 1.06 (1.00-1.12) |  |
| 1-10 years follow-up                                                                                                                 | 3,072/82,690          | 8.59 (8.28-8.89)                       | 17,840/413,405     | 8.13 (8.01-8.25)                       | 1.06 (1.02-1.10)        | 1.08 (1.03-1.13) |  |
| 1-22 years follow-up                                                                                                                 | 3,462/82,690          | 8.13 (7.86-8.40)                       | 21,879/413,405     | 7.97 (7.86-8.07)                       | 1.01 (0.98-1.05)        | 1.08 (1.03-1.12) |  |
| Dementia subtypes, 1-22 years follow-up                                                                                              |                       |                                        |                    |                                        |                         |                  |  |
| Alzheimer's disease                                                                                                                  | 863/82,690            | 2.03 (1.89-2.16)                       | 7,662/413,405      | 2.79 (2.73-2.85)                       | 0.73 (0.68-0.78)        | 0.85 (0.78-0.92) |  |
| Vascular dementia                                                                                                                    | 585/82,690            | 1.37 (1.26-1.49)                       | 2,608/413,405      | 0.95 (0.91-0.99)                       | 1.43 (1.31-1.56)        | 1.26 (1.14-1.40) |  |
| Other dementia                                                                                                                       | 2,014/82,690          | 4.73 (4.52-4.94)                       | 11,609/413,405     | 4.23 (4.15-4.30)                       | 1.11 (1.06-1.16)        | 1.18 (1.11-1.25) |  |
| Alzheimer's disease and other dementia                                                                                               | 2,877/82,690          | 6.76 (6.51-7.01)                       | 19,271/413,405     | 7.02 (6.92-7.12)                       | 0.96 (0.92-1.00)        | 1.04 (1.00-1.09) |  |
| Kidney disease restricted to chronic kidney disease diagnosis only, i.e., ICD-8 code 792 and ICD-10 code DN18.                       |                       |                                        |                    |                                        |                         |                  |  |
| All-cause dementia                                                                                                                   |                       |                                        |                    |                                        |                         |                  |  |
| 1-5 years follow-up                                                                                                                  | 1,232/48,243          | 10.0 (9.47-10.6)                       | 6,689/241,203      | 9.23 (9.01-9.45)                       | 1.09 (1.02-1.16)        | 1.03 (0.96-1.11) |  |
| 1-10 years follow-up                                                                                                                 | 1,646/48,243          | 9.68 (9.22-10.2)                       | 10,564/241,203     | 9.36 (9.18-9.54)                       | 1.04 (0.98-1.09)        | 1.03 (0.97-1.10) |  |
| 1-22 years follow-up                                                                                                                 | 1,739/48,243          | 9.38 (8.95-9.83)                       | 12,172/241,203     | 9.25 (9.09-9.42)                       | 1.01 (0.96-1.06)        | 1.04 (0.98-1.10) |  |

The subtypes of all-cause dementia are mutually exclusive, i.e., only the first diagnosis of any subtype of dementia is considered.

Kidney disease was defined as chronic kidney disease and several other persistent kidney diseases as well as dialysis treatment or kidney transplant in the definition of kidney disease (supplemental table 1).

1  
2 Chronic kidney disease was defined as ICD-8 code 792 and ICD-10 code N18.  
3

4  
5 Multifactorially adjusted model included adjustments for covariates listed in table 1.  
6

7  
8 CI: confidence interval. No.: number.  
9

10  
11  
12  
13  
14  
15  
16  
17  
18  
19  
20  
21  
22  
23  
24  
25  
26  
27  
28  
29  
30  
31  
32  
33  
34  
35  
36  
37  
38  
39  
40  
41  
42  
43  
44  
45  
46

For peer review only



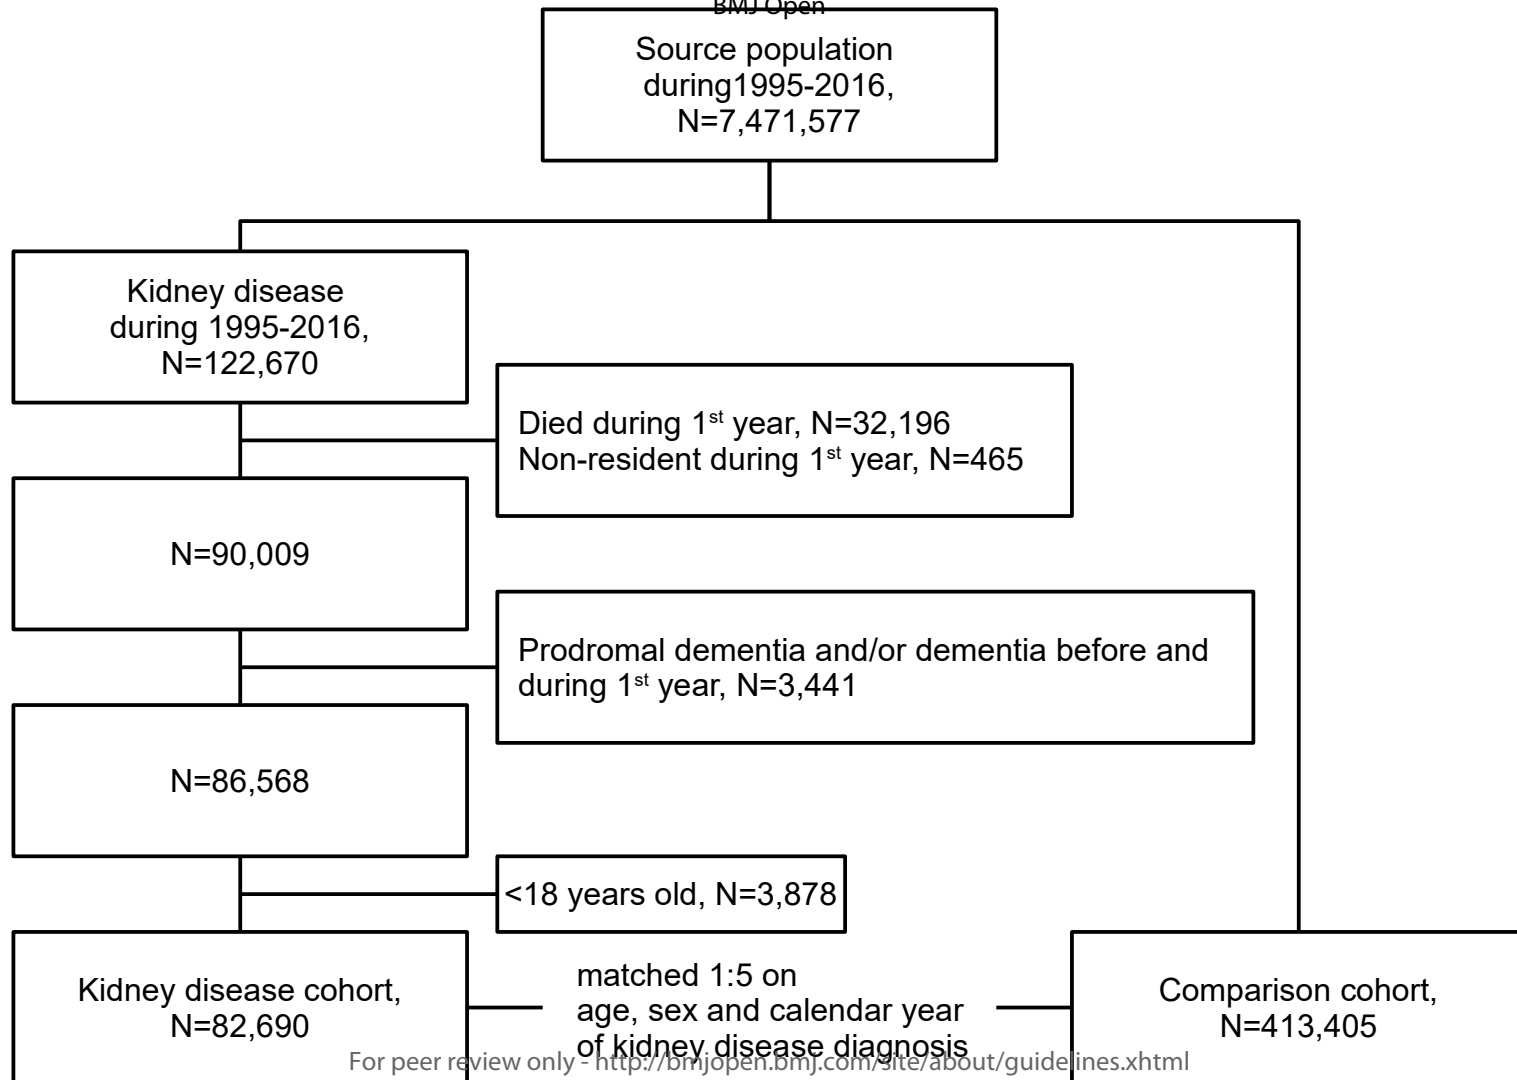

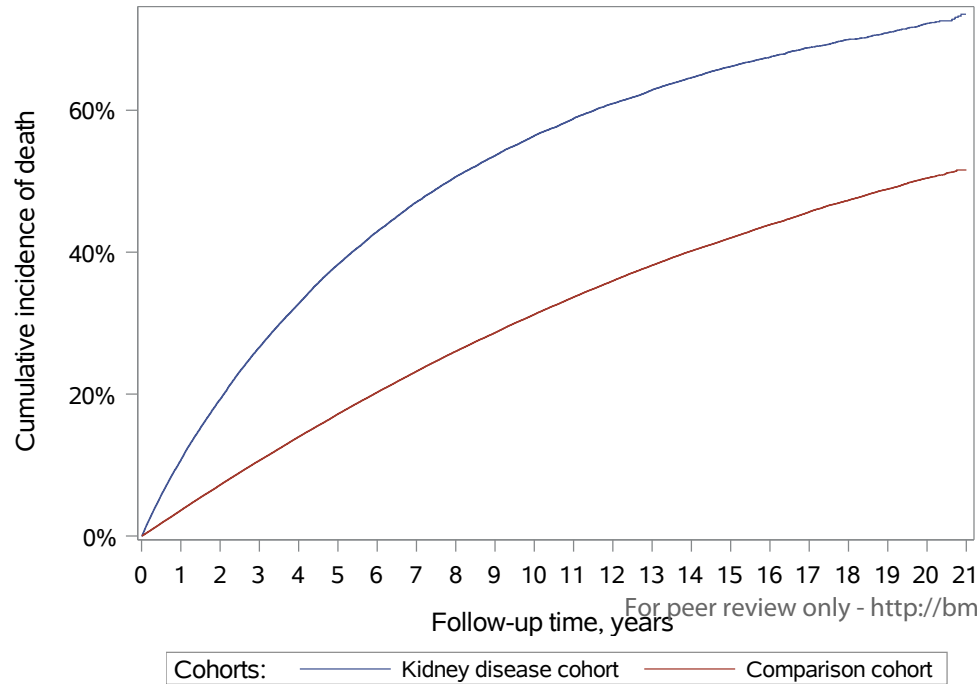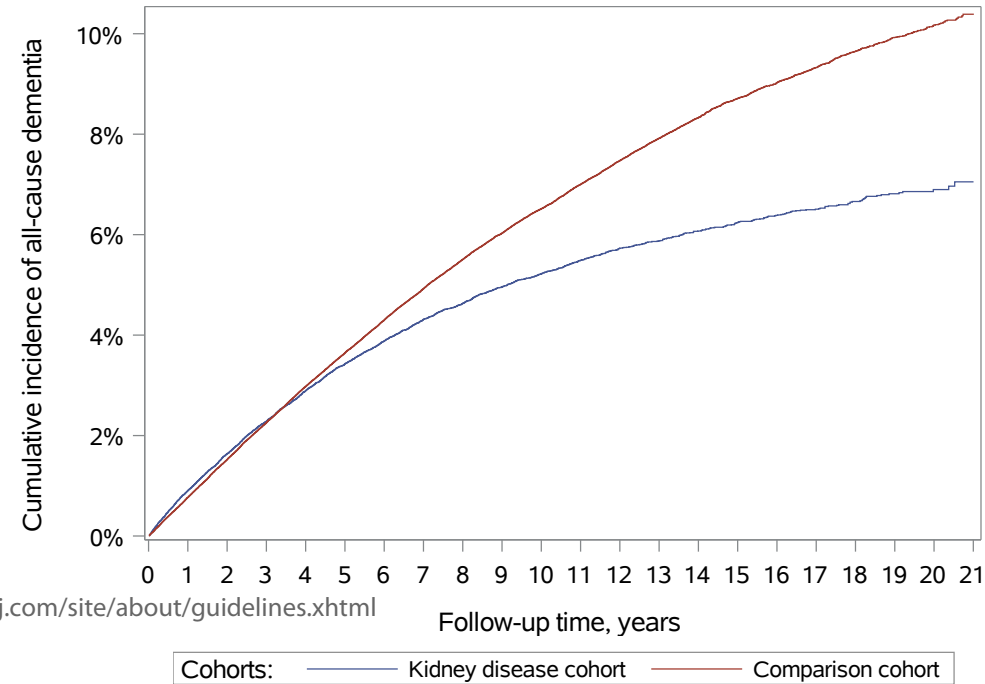

Unadjusted

Adjusted

HR (95% CI)

HR (95% CI)

Age groups, years

|   |       |                    |                    |
|---|-------|--------------------|--------------------|
| 1 | 18-49 | 2.34 (1.76 - 3.11) | 1.14 (0.78 - 1.67) |
| 2 | 50-59 | 1.95 (1.66 - 2.30) | 1.32 (1.08 - 1.61) |
| 3 | 60-74 | 1.48 (1.39 - 1.57) | 1.16 (1.08 - 1.24) |
| 4 | 75-84 | 1.10 (1.04 - 1.16) | 1.01 (0.95 - 1.08) |
| 5 | 85+   | 0.93 (0.84 - 1.02) | 0.90 (0.77 - 1.04) |

Sex

|   |        |                    |                    |
|---|--------|--------------------|--------------------|
| 7 | Male   | 1.03 (0.98 - 1.08) | 1.07 (1.01 - 1.13) |
| 8 | Female | 1.00 (0.94 - 1.05) | 1.09 (1.02 - 1.16) |

Calendar period of match date

|    |           |                    |                    |
|----|-----------|--------------------|--------------------|
| 10 | 1995-2003 | 0.95 (0.90 - 1.00) | 1.11 (1.03 - 1.19) |
| 11 | 2004-2016 | 1.07 (1.02 - 1.12) | 1.05 (1.00 - 1.11) |

Any cancer

|    |     |                    |                    |
|----|-----|--------------------|--------------------|
| 13 | No  | 1.02 (0.98 - 1.06) | 1.10 (1.05 - 1.15) |
| 14 | Yes | 0.84 (0.76 - 0.93) | 0.90 (0.80 - 1.02) |

Angina pectoris

|    |     |                    |                    |
|----|-----|--------------------|--------------------|
| 15 | No  | 0.94 (0.91 - 0.98) | 1.08 (1.03 - 1.14) |
| 16 | Yes | 0.98 (0.91 - 1.06) | 1.05 (0.96 - 1.15) |

Myocardial infarction

|    |     |                    |                    |
|----|-----|--------------------|--------------------|
| 18 | No  | 0.99 (0.95 - 1.03) | 1.08 (1.03 - 1.13) |
| 19 | Yes | 0.94 (0.85 - 1.04) | 1.03 (0.92 - 1.17) |

Stroke

|    |     |                    |                    |
|----|-----|--------------------|--------------------|
| 21 | No  | 0.98 (0.95 - 1.02) | 1.08 (1.03 - 1.13) |
| 22 | Yes | 0.85 (0.76 - 0.94) | 1.04 (0.93 - 1.17) |

Peripheral artery disease

|    |     |                    |                    |
|----|-----|--------------------|--------------------|
| 24 | No  | 0.98 (0.95 - 1.02) | 1.08 (1.03 - 1.13) |
| 25 | Yes | 0.87 (0.78 - 0.97) | 1.03 (0.90 - 1.17) |

Venous thromboembolism

|    |     |                    |                    |
|----|-----|--------------------|--------------------|
| 27 | No  | 1.02 (0.98 - 1.05) | 1.08 (1.04 - 1.13) |
| 28 | Yes | 0.78 (0.66 - 0.94) | 0.90 (0.72 - 1.11) |

Heart failure

|    |     |                    |                    |
|----|-----|--------------------|--------------------|
| 29 | No  | 0.96 (0.92 - 1.00) | 1.09 (1.04 - 1.14) |
| 30 | Yes | 0.79 (0.72 - 0.88) | 0.94 (0.83 - 1.07) |

Heart valve disease

|    |     |                    |                    |
|----|-----|--------------------|--------------------|
| 32 | No  | 1.00 (0.96 - 1.04) | 1.08 (1.04 - 1.13) |
| 33 | Yes | 0.87 (0.74 - 1.02) | 0.94 (0.78 - 1.12) |

Atrial fibrillation

|    |     |                    |                    |
|----|-----|--------------------|--------------------|
| 35 | No  | 0.99 (0.95 - 1.03) | 1.11 (1.06 - 1.16) |
| 36 | Yes | 0.83 (0.75 - 0.92) | 0.88 (0.78 - 0.99) |

Hypercholesterolemia

|    |     |                    |                    |
|----|-----|--------------------|--------------------|
| 38 | No  | 0.97 (0.93 - 1.01) | 1.08 (1.02 - 1.14) |
| 39 | Yes | 0.90 (0.84 - 0.96) | 1.05 (0.98 - 1.13) |

Hypertension

|    |     |                    |                    |
|----|-----|--------------------|--------------------|
| 41 | No  | 0.72 (0.66 - 0.79) | 1.21 (1.09 - 1.34) |
| 42 | Yes | 0.79 (0.76 - 0.82) | 1.04 (0.99 - 1.09) |

Obesity

|    |     |                    |                    |
|----|-----|--------------------|--------------------|
| 44 | No  | 1.02 (0.99 - 1.06) | 1.08 (1.03 - 1.13) |
| 45 | Yes | 0.91 (0.78 - 1.07) | 1.00 (0.84 - 1.20) |

Diabetes mellitus

|    |     |                    |                    |
|----|-----|--------------------|--------------------|
| 46 | No  | 1.01 (0.97 - 1.05) | 1.11 (1.06 - 1.16) |
| 47 | Yes | 0.60 (0.55 - 0.65) | 0.89 (0.81 - 0.97) |

Chronic obstructive pulmonary disease

|    |     |                    |                    |
|----|-----|--------------------|--------------------|
| 49 | No  | 0.99 (0.95 - 1.03) | 1.07 (1.02 - 1.12) |
| 50 | Yes | 1.04 (0.93 - 1.15) | 1.13 (1.00 - 1.28) |

Personal gross income during the

|    |          |                    |                    |
|----|----------|--------------------|--------------------|
| 52 | 0%-25%   | 0.95 (0.89 - 1.01) | 1.13 (1.05 - 1.22) |
| 53 | 26%-50%  | 0.88 (0.83 - 0.94) | 0.98 (0.91 - 1.06) |
| 54 | 51%-75%  | 0.99 (0.91 - 1.07) | 1.05 (0.96 - 1.16) |
| 55 | 76%-100% | 1.17 (1.05 - 1.31) | 1.23 (1.09 - 1.39) |

Employment status during the year preceding the index date

|    |               |                    |                    |
|----|---------------|--------------------|--------------------|
| 57 | Employed      | 1.11 (0.99 - 1.25) | 1.10 (0.96 - 1.27) |
| 58 | Unemployed    | 1.28 (0.91 - 1.81) | 1.39 (0.92 - 2.10) |
| 59 | Not available | 1.37 (1.19 - 1.59) | 1.31 (1.09 - 1.57) |
| 60 | Retired       | 1.09 (1.04 - 1.13) | 1.06 (1.01 - 1.11) |

Highest education achieved

|  |        |                    |                    |
|--|--------|--------------------|--------------------|
|  | Low    | 1.00 (0.95 - 1.05) | 1.08 (1.02 - 1.14) |
|  | Medium | 1.11 (1.04 - 1.19) | 1.07 (0.99 - 1.15) |
|  | High   | 1.08 (0.96 - 1.23) | 1.08 (0.94 - 1.23) |

Supplemental table 1. List of codes for diagnoses, procedures and prescriptions on which definitions of exposure, outcomes and covariates were based.

| Diagnoses and procedures                                                        |                                                        | Cases,<br>first time | Cases,<br>ever | ICD-8 codes                                     | ICD-10 codes                                                                                                                     | Procedur<br>e codes | ATC<br>codes |
|---------------------------------------------------------------------------------|--------------------------------------------------------|----------------------|----------------|-------------------------------------------------|----------------------------------------------------------------------------------------------------------------------------------|---------------------|--------------|
| Kidney disease                                                                  |                                                        |                      |                |                                                 |                                                                                                                                  |                     |              |
| Subtypes of kidney disease                                                      | <b>Chronic kidney disease</b>                          | 41,925               | 58,025         | <b>792</b>                                      | <b>N18</b>                                                                                                                       |                     |              |
|                                                                                 | Diabetic nephropathy                                   | 19,462               | 24,852         | 249.02, 250.02                                  | E102, E112, E132, E142, N08.3                                                                                                    |                     |              |
|                                                                                 | Glomerulonephritis (without nephrotic syndrome)        | 2,240                | 3,719          | 582                                             | N03                                                                                                                              |                     |              |
|                                                                                 | Hereditary nephropathy, not elsewhere classified       | 169                  | 256            | 756.0, 753.3                                    | N07                                                                                                                              |                     |              |
|                                                                                 | Chronic tubulo-interstitial nephritis                  | 2,195                | 2,934          | 590.09, 593.20, 760.4                           | N11                                                                                                                              |                     |              |
|                                                                                 | Glomerular disorders in diseases classified elsewhere  | 338                  | 1,613          |                                                 | N08                                                                                                                              |                     |              |
|                                                                                 | Unspecified kidney failure                             | 15,234               | 26,641         |                                                 | N19                                                                                                                              |                     |              |
|                                                                                 | Hypertensive nephropathy                               | 4,407                | 7,858          | 403, 404                                        | I12, I13                                                                                                                         |                     |              |
|                                                                                 | Albuminuria/proteinuria                                | 1,967                | 2,291          | 789.0                                           | N39.1                                                                                                                            |                     |              |
|                                                                                 | Recurrent and persistent haematuria                    | 3,371                | 3,593          |                                                 | N02                                                                                                                              |                     |              |
|                                                                                 | Renal agenesis and other reductional defects of kidney | 379                  | 437            |                                                 | Q60                                                                                                                              |                     |              |
|                                                                                 | Polycystic kidney disease                              | 2,328                | 2,837          | 753.10-753.19                                   | Q61.1-Q61.4                                                                                                                      |                     |              |
|                                                                                 | Dialysis                                               |                      | 1,918          | 13,872                                          |                                                                                                                                  | Z99.2               |              |
| April 1, 1973 - December 31, 1995                                               |                                                        |                      |                |                                                 |                                                                                                                                  | 94300,<br>94340     |              |
| <1996                                                                           |                                                        |                      |                |                                                 |                                                                                                                                  | 94350               |              |
| >=1996                                                                          |                                                        |                      |                |                                                 |                                                                                                                                  |                     |              |
| Kidney transplant                                                               |                                                        | 245                  | 2,560          | Y95.09                                          | Z94.0                                                                                                                            |                     |              |
|                                                                                 | 1973-1995                                              |                      |                |                                                 |                                                                                                                                  | 57480,<br>57490     |              |
|                                                                                 | >=1996                                                 |                      |                |                                                 |                                                                                                                                  | KKAS                |              |
| Diagnoses related to dementia (mild cognitive impairment and amnesic syndromes) |                                                        |                      |                | 291.19                                          | F04, F05.1, F06.7, F10.6, F18.6, F19.6                                                                                           |                     |              |
| Outcomes                                                                        |                                                        |                      |                |                                                 |                                                                                                                                  |                     |              |
|                                                                                 | All-cause dementia                                     |                      |                | 290.09, 290.10, 293.09, 293.19, 094.19, 292.09, | F00, G30, G30.0, G30.1, G30.8, G30.9), F01.0x, F01.1x, F01.2x, F01.3x, F01.8X, F01.9x), F02, F03, F1x.73 (F10.73-F19.73); G23.1; |                     |              |

|            |                                       |  |                                                                         |                                                                                      |                    |
|------------|---------------------------------------|--|-------------------------------------------------------------------------|--------------------------------------------------------------------------------------|--------------------|
|            |                                       |  | 290.11, 290.18, 290.19                                                  | G31.0, G31.0A, G31.0B, G31.1, G31.8B, G31.8E, G31.85                                 |                    |
|            | Alzheimer's disease                   |  | 290.09, 290.10                                                          | F00, G30, G30.0, G30.1, G30.8, G30.9                                                 |                    |
|            | Vascular dementia                     |  | 293.09, 293.19                                                          | F01.0x, F01.1x, F01.2x, F01.3x, F01.8X, F01.9x                                       |                    |
|            | Other dementia                        |  | 094.19, 292.09, 290.11, 290.18, 290.19                                  | F02, F03, F10.73-F19.73; G23.1; G31.0, G31.0A, G31.0B, G31.1, G31.8B, G31.8E, G31.85 |                    |
| Covariates |                                       |  |                                                                         |                                                                                      |                    |
|            | Angina pectoris                       |  | 413                                                                     | I20 (except I20.0), I25.1, I25.9                                                     |                    |
|            | Myocardial infarction                 |  | 410                                                                     | I21, I22, I23                                                                        |                    |
|            | Stroke                                |  | 431, 433-434                                                            | I61, I63-I64                                                                         |                    |
|            | Peripheral artery disease             |  | 440-445                                                                 | I70, I71, I72, I73, I74, I77                                                         |                    |
|            | Venous thromboembolism                |  | 451.00, 451.08-09, 451.90, 451.92, 671.01-03, 671.08-09, 450.99, 973.99 | I80.1-I80.3, O22.3, O87.1, I26.0, I26.9, O88.2                                       |                    |
|            | Heart failure                         |  | 42709, 42710, 42711, 42719, 42899, 78249                                | I50, I11.0, I13.0, I13.2                                                             |                    |
|            | Heart valve disease                   |  | 394-398                                                                 | I05, I06, I07, I08.0, I09.8, I34-I37, I39.0, I39.3, I51.1A, Q22                      |                    |
|            | Atrial fibrillation                   |  | 42793, 42794                                                            | I48                                                                                  |                    |
|            | Hypercholesterolemia                  |  | 27200                                                                   | E780                                                                                 | C10                |
|            | Hypertension                          |  | 400-404                                                                 | D110-D115, I67.4                                                                     | C02-C03<br>C07-C09 |
|            | Obesity                               |  | 277                                                                     | E65-E68                                                                              |                    |
|            | Diabetes mellitus                     |  | 249, 250 (excluding 249.02, 250.02)                                     | E10 (excluding E10.2), E11 (excluding E11.2), H36.0                                  |                    |
|            | Chronic obstructive pulmonary disease |  | 490-493, 515-518                                                        | J40-J47; J60-J67; J68.4; J70.1; J70.3; J84.1; J92.0; J96.1; J98.2; J98.3             |                    |
|            | Cancer                                |  | 140-172, 174-194, 200-207                                               | C00-26, C30-34, C37-41, C43, C45-58, C60-76, C80-85, C88, C90-97                     |                    |

1  
2  
3  
4  
5  
6  
7  
8  
9  
10  
11  
12  
13  
14  
15  
16  
17  
18  
19  
20  
21  
22  
23  
24  
25  
26  
27  
28  
29  
30  
31  
32  
33  
34  
35  
36  
37  
38  
39  
40  
41  
42  
43  
44  
45  
46

**Supplemental figure 1.** Proportional hazards for A) all-cause dementia, B) Alzheimer’s disease, C) vascular dementia and D) other dementia.

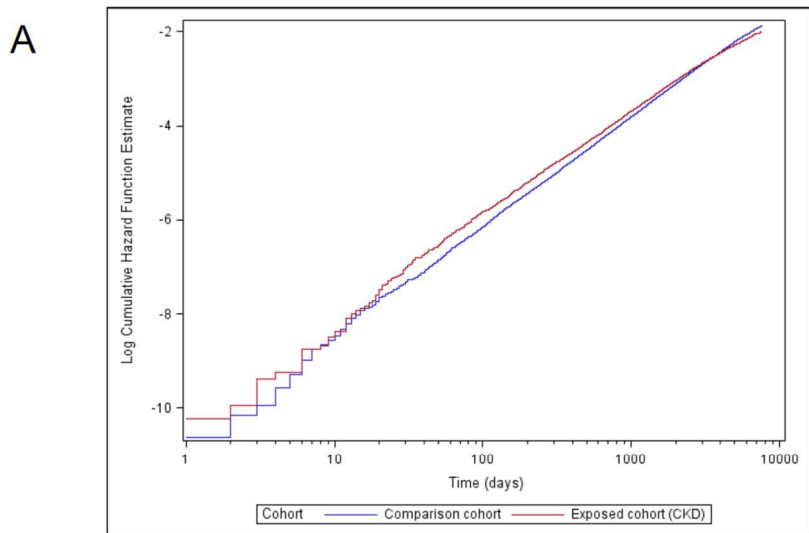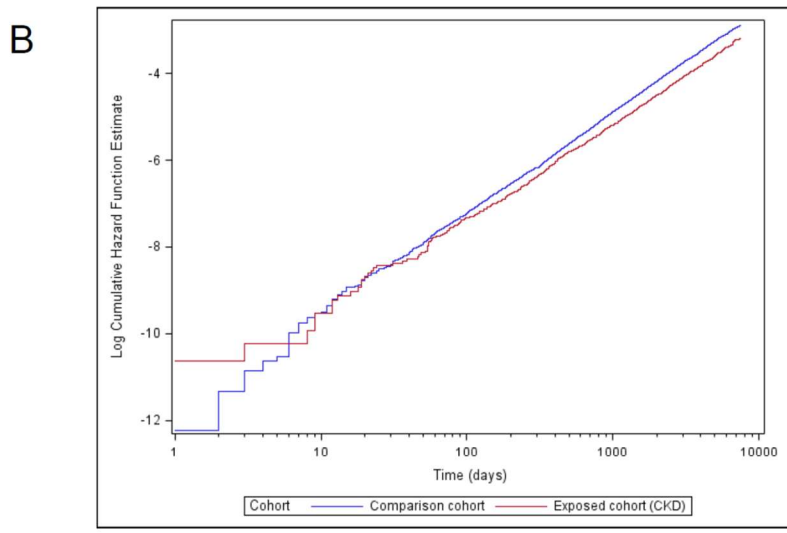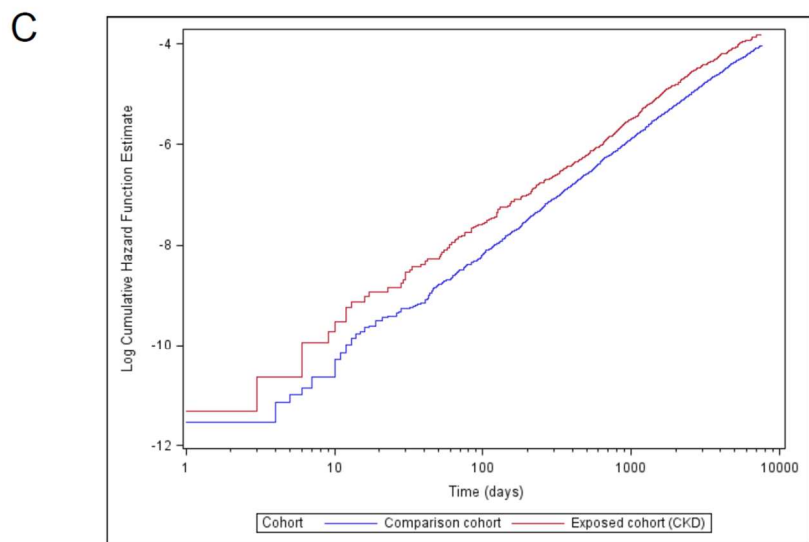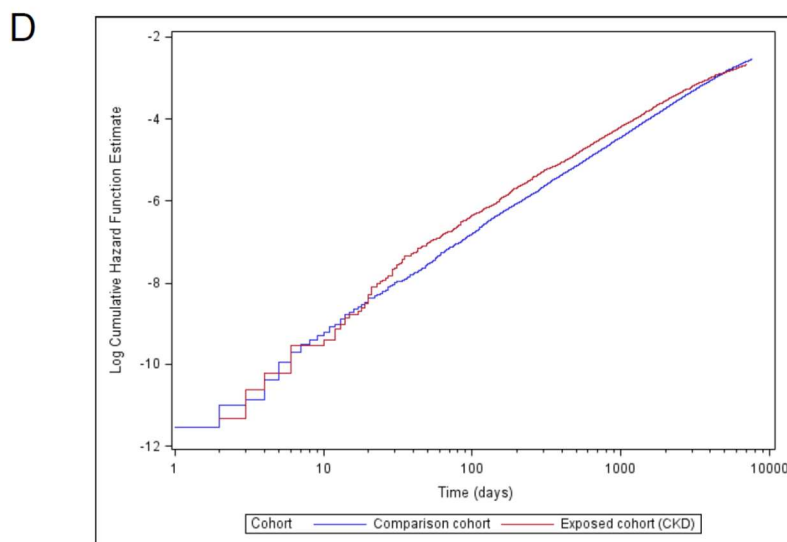

**Supplemental figure 2.** Risk of dementia subtypes in patients with kidney disease compared with individuals in a matched population without kidney disease stratified by covariates listed in Table 1.

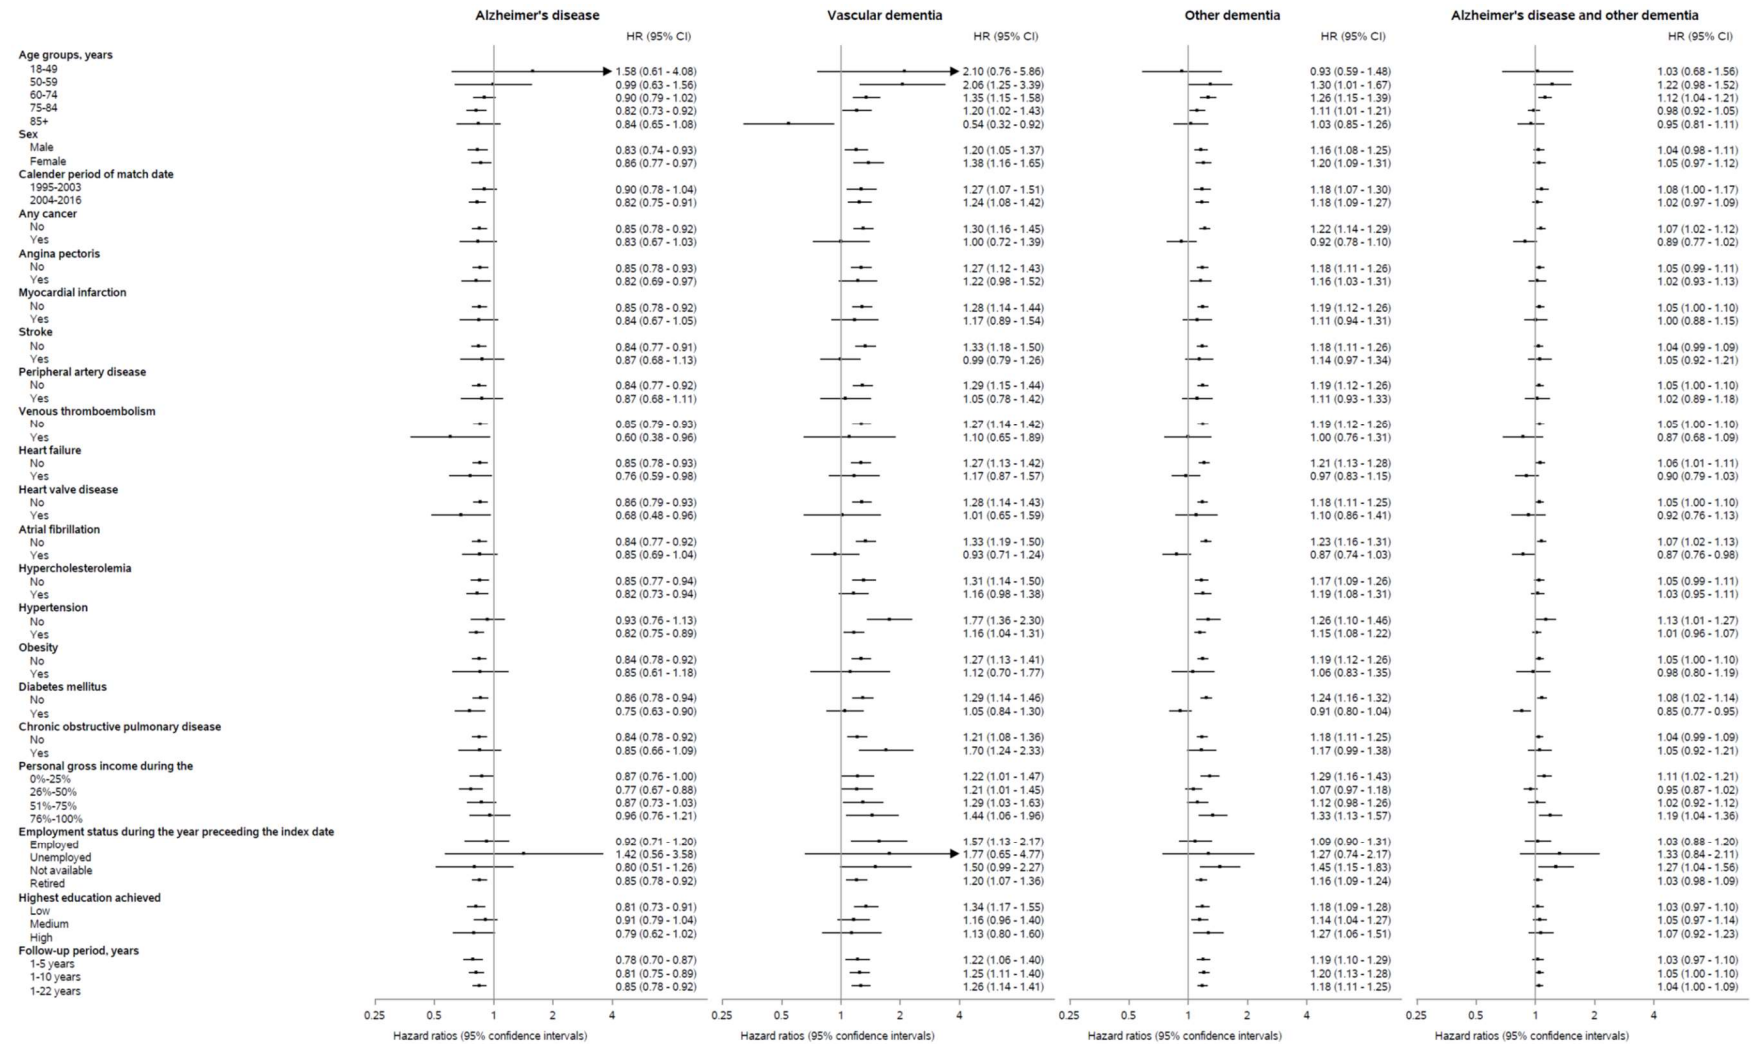

HR: hazard ratio. 95% CI: 95% confidence interval.

**STROBE 2007 (v4) Statement—Checklist of items that should be included in reports of cohort studies**

| Section/Topic             | Item # | Recommendation                                                                                                                                                                       | Reported on page # |
|---------------------------|--------|--------------------------------------------------------------------------------------------------------------------------------------------------------------------------------------|--------------------|
| <b>Title and abstract</b> | 1      | (a) Indicate the study’s design with a commonly used term in the title or the abstract                                                                                               | 1                  |
|                           |        | (b) Provide in the abstract an informative and balanced summary of what was done and what was found                                                                                  | 2-3                |
| <b>Introduction</b>       |        |                                                                                                                                                                                      |                    |
| Background/rationale      | 2      | Explain the scientific background and rationale for the investigation being reported                                                                                                 | 6                  |
| Objectives                | 3      | State specific objectives, including any prespecified hypotheses                                                                                                                     | 6                  |
| <b>Methods</b>            |        |                                                                                                                                                                                      |                    |
| Study design              | 4      | Present key elements of study design early in the paper                                                                                                                              | 7                  |
| Setting                   | 5      | Describe the setting, locations, and relevant dates, including periods of recruitment, exposure, follow-up, and data collection                                                      | 7-10               |
| Participants              | 6      | (a) Give the eligibility criteria, and the sources and methods of selection of participants. Describe methods of follow-up                                                           | 7                  |
|                           |        | (b) For matched studies, give matching criteria and number of exposed and unexposed                                                                                                  | 7                  |
| Variables                 | 7      | Clearly define all outcomes, exposures, predictors, potential confounders, and effect modifiers. Give diagnostic criteria, if applicable                                             | 7-10               |
| Data sources/ measurement | 8*     | For each variable of interest, give sources of data and details of methods of assessment (measurement). Describe comparability of assessment methods if there is more than one group | 7-10               |
| Bias                      | 9      | Describe any efforts to address potential sources of bias                                                                                                                            | 7-11               |
| Study size                | 10     | Explain how the study size was arrived at                                                                                                                                            |                    |
| Quantitative variables    | 11     | Explain how quantitative variables were handled in the analyses. If applicable, describe which groupings were chosen and why                                                         | 7-11               |
| Statistical methods       | 12     | (a) Describe all statistical methods, including those used to control for confounding                                                                                                | 10-11              |
|                           |        | (b) Describe any methods used to examine subgroups and interactions                                                                                                                  | 10-11              |
|                           |        | (c) Explain how missing data were addressed                                                                                                                                          | 10-11              |
|                           |        | (d) If applicable, explain how loss to follow-up was addressed                                                                                                                       | NA                 |
|                           |        | (e) Describe any sensitivity analyses                                                                                                                                                | 10-11              |
| <b>Results</b>            |        |                                                                                                                                                                                      |                    |



|                          |     |                                                                                                                                                                                                              |                             |
|--------------------------|-----|--------------------------------------------------------------------------------------------------------------------------------------------------------------------------------------------------------------|-----------------------------|
| Participants             | 13* | (a) Report numbers of individuals at each stage of study—eg numbers potentially eligible, examined for eligibility, confirmed eligible, included in the study, completing follow-up, and analysed            | 11                          |
|                          |     | (b) Give reasons for non-participation at each stage                                                                                                                                                         | 11                          |
|                          |     | (c) Consider use of a flow diagram                                                                                                                                                                           | Figure 1                    |
| Descriptive data         | 14* | (a) Give characteristics of study participants (eg demographic, clinical, social) and information on exposures and potential confounders                                                                     | Table 1                     |
|                          |     | (b) Indicate number of participants with missing data for each variable of interest                                                                                                                          | Table 1                     |
|                          |     | (c) Summarise follow-up time (eg, average and total amount)                                                                                                                                                  | 11-12                       |
| Outcome data             | 15* | Report numbers of outcome events or summary measures over time                                                                                                                                               | 11-12                       |
| Main results             | 16  | (a) Give unadjusted estimates and, if applicable, confounder-adjusted estimates and their precision (eg, 95% confidence interval). Make clear which confounders were adjusted for and why they were included | 11-13<br>Figures and Tables |
|                          |     | (b) Report category boundaries when continuous variables were categorized                                                                                                                                    | Figures and Tables          |
|                          |     | (c) If relevant, consider translating estimates of relative risk into absolute risk for a meaningful time period                                                                                             | NA                          |
| Other analyses           | 17  | Report other analyses done—eg analyses of subgroups and interactions, and sensitivity analyses                                                                                                               | 11-13                       |
| <b>Discussion</b>        |     |                                                                                                                                                                                                              |                             |
| Key results              | 18  | Summarise key results with reference to study objectives                                                                                                                                                     | 13                          |
| <b>Limitations</b>       |     |                                                                                                                                                                                                              |                             |
| Interpretation           | 20  | Give a cautious overall interpretation of results considering objectives, limitations, multiplicity of analyses, results from similar studies, and other relevant evidence                                   | 13-16                       |
| Generalisability         | 21  | Discuss the generalisability (external validity) of the study results                                                                                                                                        | 13-16                       |
| <b>Other information</b> |     |                                                                                                                                                                                                              |                             |
| Funding                  | 22  | Give the source of funding and the role of the funders for the present study and, if applicable, for the original study on which the present article is based                                                | 4                           |

\*Give information separately for cases and controls in case-control studies and, if applicable, for exposed and unexposed groups in cohort and cross-sectional studies.

**Note:** An Explanation and Elaboration article discusses each checklist item and gives methodological background and published examples of transparent reporting. The STROBE checklist is best used in conjunction with this article (freely available on the Web sites of PLoS Medicine at <http://www.plosmedicine.org/>, Annals of Internal Medicine at <http://www.annals.org/>, and Epidemiology at <http://www.epidem.com/>). Information on the STROBE Initiative is available at [www.strobe-statement.org](http://www.strobe-statement.org).
