# Supplementary material for: Kidney disease and risk of dementia: a Danish nationwide cohort study
Source: PubMed Central journal article supplement — BMJ Open. 2021 Oct 22;11(10):e052652. doi: 10.1136/bmjopen-2021-052652 (PMC8543681; doi:10.1136/bmjopen-2021-052652), 2021-10-22
Supplement: bmjopen-2021-052652supp001.pdf [file bmjopen-2021-052652supp001.pdf]

Supplemental table 1. List of codes for diagnoses, procedures and prescriptions on which definitions of exposure, outcomes and covariates were based.

| Diagnoses and procedures                                                        |                                                        | Cases, first time | Cases, ever | ICD-8 codes                                     | ICD-10 codes                                                                                                                     | Procedure codes | ATC codes |
|---------------------------------------------------------------------------------|--------------------------------------------------------|-------------------|-------------|-------------------------------------------------|----------------------------------------------------------------------------------------------------------------------------------|-----------------|-----------|
| <b>Kidney disease</b>                                                           |                                                        |                   |             |                                                 |                                                                                                                                  |                 |           |
|                                                                                 | <b>Chronic kidney disease</b>                          | 41,925            | 58,025      | <b>792</b>                                      | <b>N18</b>                                                                                                                       |                 |           |
| Subtypes of kidney disease                                                      | Diabetic nephropathy                                   | 19,462            | 24,852      | 249.02, 250.02                                  | E102, E112, E132, E142, N08.3                                                                                                    |                 |           |
|                                                                                 | Glomerulonephritis (without nephrotic syndrome)        | 2,240             | 3,719       | 582                                             | N03                                                                                                                              |                 |           |
|                                                                                 | Hereditary nephropathy, not elsewhere classified       | 169               | 256         | 756.0, 753.3                                    | N07                                                                                                                              |                 |           |
|                                                                                 | Chronic tubulo-interstitial nephritis                  | 2,195             | 2,934       | 590.09, 593.20, 760.4                           | N11                                                                                                                              |                 |           |
|                                                                                 | Glomerular disorders in diseases classified elsewhere  | 338               | 1,613       |                                                 | N08                                                                                                                              |                 |           |
|                                                                                 | Unspecified kidney failure                             | 15,234            | 26,641      |                                                 | N19                                                                                                                              |                 |           |
|                                                                                 | Hypertensive nephropathy                               | 4,407             | 7,858       | 403, 404                                        | I12, I13                                                                                                                         |                 |           |
|                                                                                 | Albuminuria/proteinuria                                | 1,967             | 2,291       | 789.0                                           | N39.1                                                                                                                            |                 |           |
|                                                                                 | Recurrent and persistent haematuria                    | 3,371             | 3,593       |                                                 | N02                                                                                                                              |                 |           |
|                                                                                 | Renal agenesis and other reductional defects of kidney | 379               | 437         |                                                 | Q60                                                                                                                              |                 |           |
|                                                                                 | Polycystic kidney disease                              | 2,328             | 2,837       | 753.10-753.19                                   | Q61.1-Q61.4                                                                                                                      |                 |           |
| Dialysis                                                                        |                                                        | 1,918             | 13,872      |                                                 | Z99.2                                                                                                                            |                 |           |
|                                                                                 | April 1, 1973 - December 31, 1995                      |                   |             |                                                 |                                                                                                                                  | 94300, 94340    |           |
|                                                                                 | <1996                                                  |                   |             |                                                 |                                                                                                                                  | 94350           |           |
| Kidney transplant                                                               | >=1996                                                 |                   |             |                                                 |                                                                                                                                  |                 |           |
|                                                                                 |                                                        | 245               | 2,560       | Y95.09                                          | Z94.0                                                                                                                            |                 |           |
|                                                                                 | 1973-1995                                              |                   |             |                                                 |                                                                                                                                  | 57480, 57490    |           |
|                                                                                 | >=1996                                                 |                   |             |                                                 |                                                                                                                                  | KKAS            |           |
| Diagnoses related to dementia (mild cognitive impairment and amnesic syndromes) |                                                        |                   |             | 291.19                                          | F04, F05.1, F06.7, F10.6, F18.6, F19.6                                                                                           |                 |           |
| <b>Outcomes</b>                                                                 |                                                        |                   |             |                                                 |                                                                                                                                  |                 |           |
|                                                                                 | All-cause dementia                                     |                   |             | 290.09, 290.10, 293.09, 293.19, 094.19, 292.09, | F00, G30, G30.0, G30.1, G30.8, G30.9), F01.0x, F01.1x, F01.2x, F01.3x, F01.8X, F01.9x), F02, F03, F1x.73 (F10.73-F19.73); G23.1; |                 |           |

|            |                                       |  |                                                                         |                                                                                      |                    |
|------------|---------------------------------------|--|-------------------------------------------------------------------------|--------------------------------------------------------------------------------------|--------------------|
|            |                                       |  | 290.11, 290.18, 290.19                                                  | G31.0, G31.0A, G31.0B, G31.1, G31.8B, G31.8E, G31.85                                 |                    |
|            | Alzheimer's disease                   |  | 290.09, 290.10                                                          | F00, G30, G30.0, G30.1, G30.8, G30.9                                                 |                    |
|            | Vascular dementia                     |  | 293.09, 293.19                                                          | F01.0x, F01.1x, F01.2x, F01.3x, F01.8X, F01.9x                                       |                    |
|            | Other dementia                        |  | 094.19, 292.09, 290.11, 290.18, 290.19                                  | F02, F03, F10.73-F19.73; G23.1; G31.0, G31.0A, G31.0B, G31.1, G31.8B, G31.8E, G31.85 |                    |
| Covariates |                                       |  |                                                                         |                                                                                      |                    |
|            | Angina pectoris                       |  | 413                                                                     | I20 (except I20.0), I25.1, I25.9                                                     |                    |
|            | Myocardial infarction                 |  | 410                                                                     | I21, I22, I23                                                                        |                    |
|            | Stroke                                |  | 431, 433-434                                                            | I61, I63-I64                                                                         |                    |
|            | Peripheral artery disease             |  | 440-445                                                                 | I70, I71, I72, I73, I74, I77                                                         |                    |
|            | Venous thromboembolism                |  | 451.00, 451.08-09, 451.90, 451.92, 671.01-03, 671.08-09, 450.99, 973.99 | I80.1-I80.3, O22.3, O87.1, I26.0, I26.9, O88.2                                       |                    |
|            | Heart failure                         |  | 42709, 42710, 42711, 42719, 42899, 78249                                | I50, I11.0, I13.0, I13.2                                                             |                    |
|            | Heart valve disease                   |  | 394-398                                                                 | I05, I06, I07, I08.0, I09.8, I34-I37, I39.0, I39.3, I51.1A, Q22                      |                    |
|            | Atrial fibrillation                   |  | 42793, 42794                                                            | I48                                                                                  |                    |
|            | Hypercholesterolemia                  |  | 27200                                                                   | E780                                                                                 | C10                |
|            | Hypertension                          |  | 400-404                                                                 | D110-DI15, I67.4                                                                     | C02-C03<br>C07-C09 |
|            | Obesity                               |  | 277                                                                     | E65-E68                                                                              |                    |
|            | Diabetes mellitus                     |  | 249, 250 (excluding 249.02, 250.02)                                     | E10 (excluding E10.2), E11 (excluding E11.2), H36.0                                  |                    |
|            | Chronic obstructive pulmonary disease |  | 490-493, 515-518                                                        | J40-J47; J60-J67; J68.4; J70.1; J70.3; J84.1; J92.0; J96.1; J98.2; J98.3             |                    |
|            | Cancer                                |  | 140-172, 174-194, 200-207                                               | C00-26, C30-34, C37-41, C43, C45-58, C60-76, C80-85, C88, C90-97                     |                    |

**Supplemental figure 1.** Proportional hazards for A) all-cause dementia, B) Alzheimer's disease, C) vascular dementia and D) other dementia.

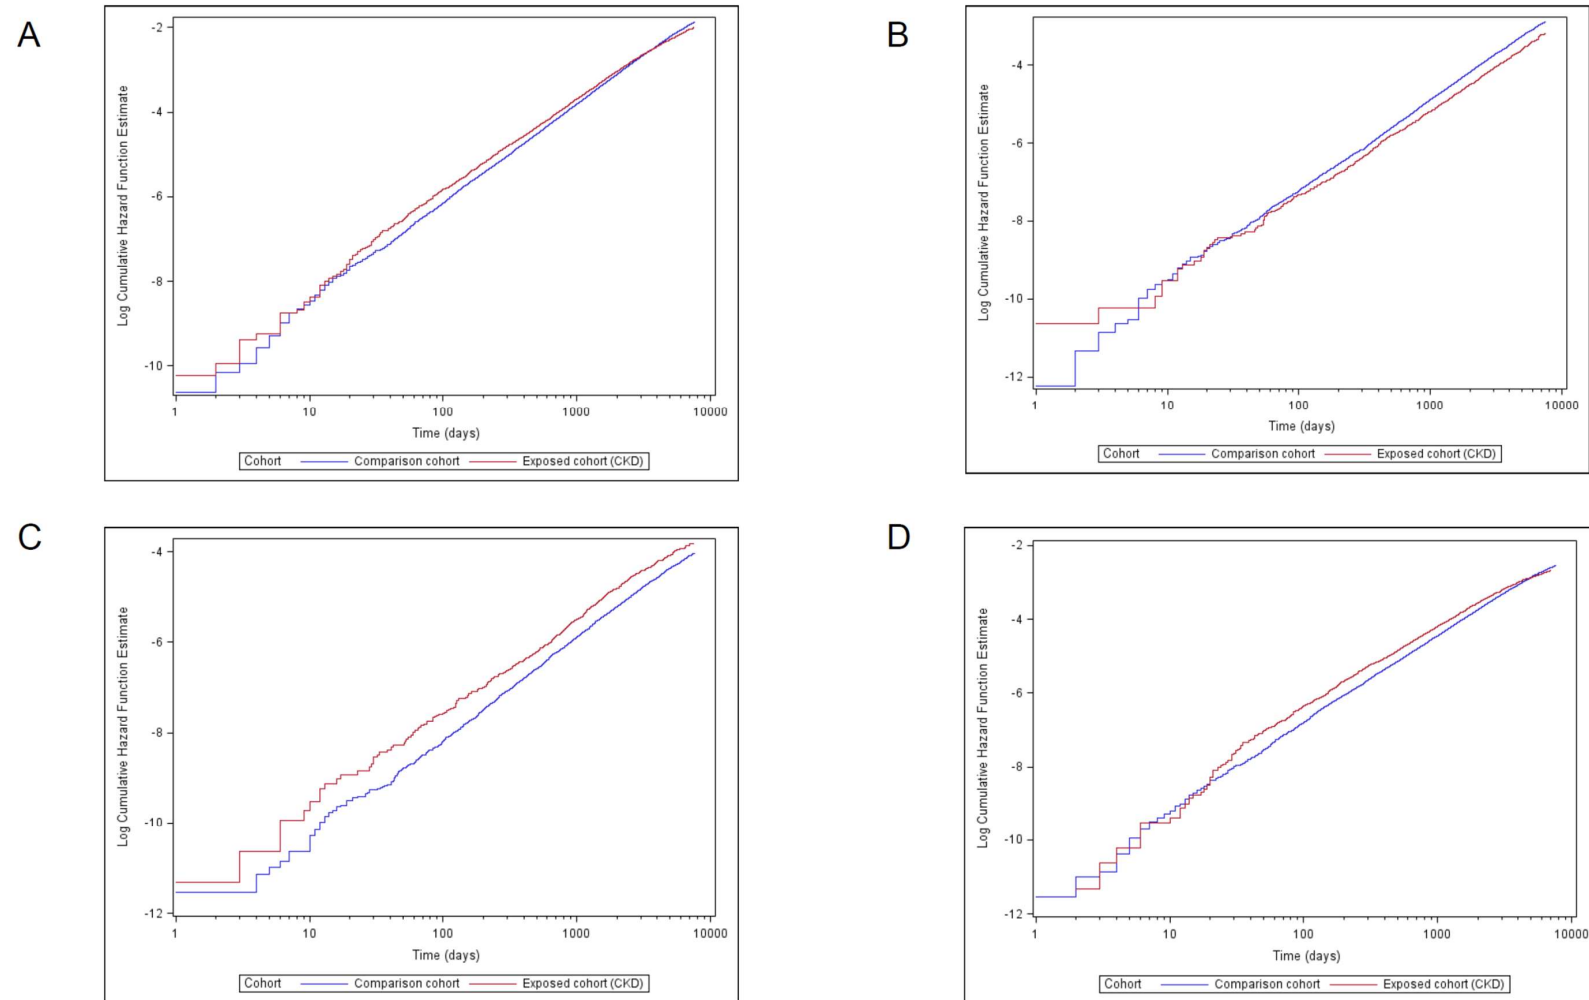

**Supplemental figure 2.** Risk of dementia subtypes in patients with kidney disease compared with individuals in a matched population without kidney disease stratified by covariates listed in Table 1.

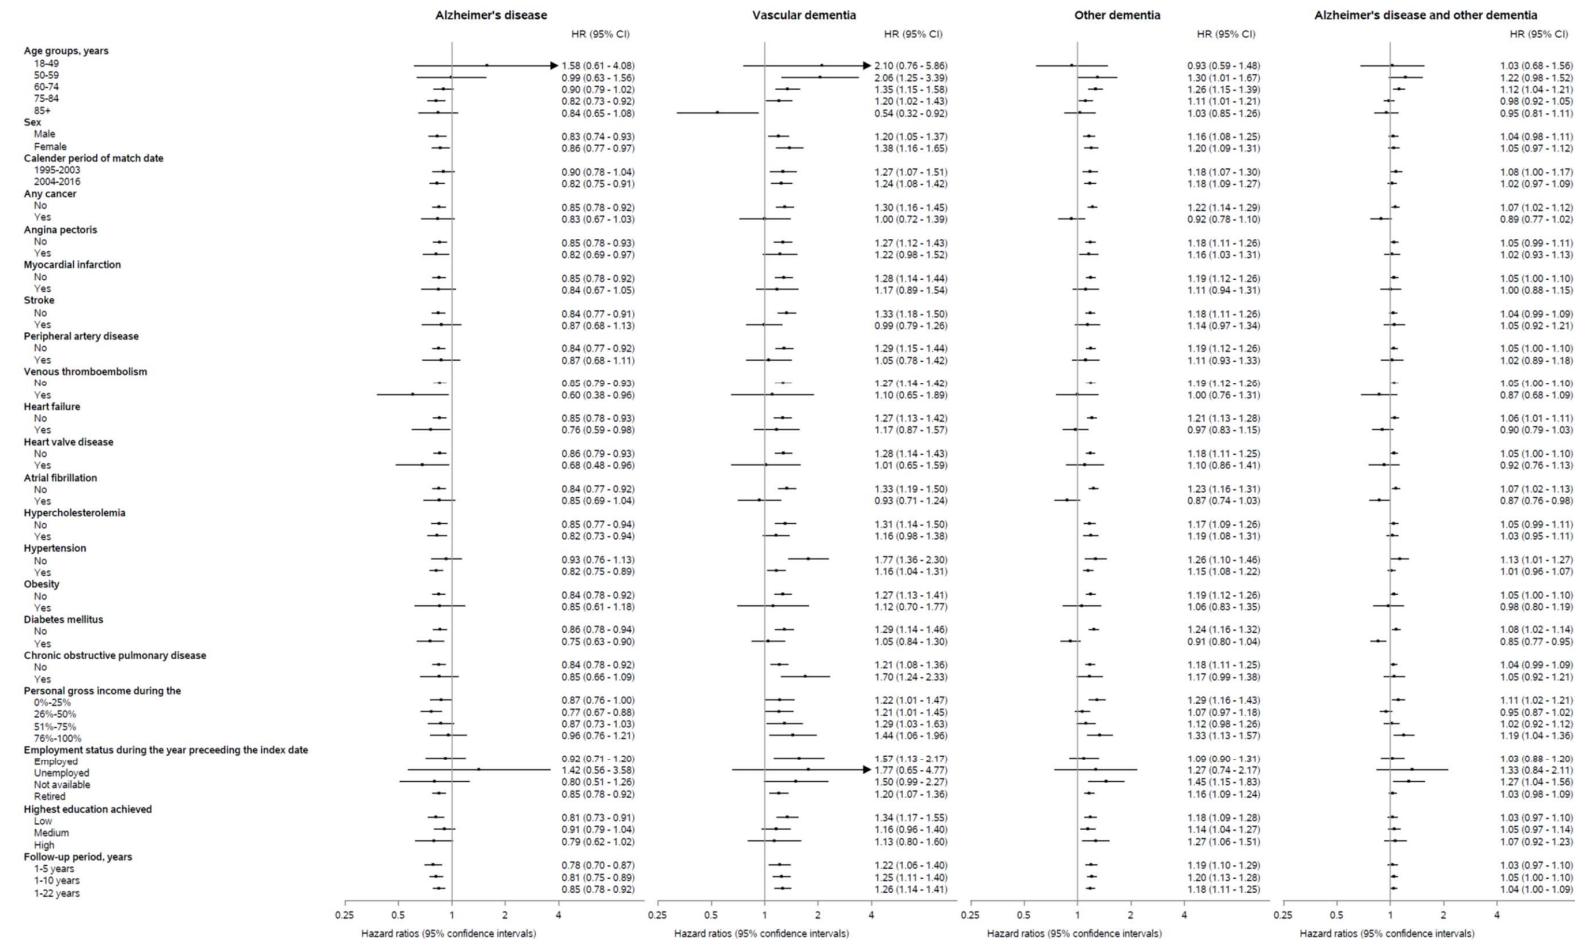

HR: hazard ratio. 95% CI: 95% confidence interval.
